## *Helicobacter pylori* accelerates KRAS-dependent gastric dysplasia

Valerie P. O'Brien<sup>1</sup>, Amanda Koehne<sup>2,3</sup>, Julien Dubrulle<sup>4</sup>, Armando E. Rodriguez<sup>1</sup>, Christina K. Leverich<sup>1</sup>, Paul Kong<sup>3</sup>, Jean S. Campbell<sup>5</sup>, Robert H. Pierce<sup>5</sup>, James R. Goldenring<sup>6</sup>, Eunyoung Choi<sup>6</sup> and Nina R. Salama<sup>1</sup>

1. Fred Hutchinson Cancer Research Center, Human Biology Division, Seattle, WA, USA
2. Fred Hutchinson Cancer Research Center, Comparative Medicine Shared Resource, Seattle, WA, USA
3. Fred Hutchinson Cancer Research Center, Experimental Histopathology Shared Resource, Seattle, WA, USA
4. Fred Hutchinson Cancer Research Center, Genomics and Bioinformatics Shared Resource, Seattle, WA, USA
5. Fred Hutchinson Cancer Research Center, Program in Immunology, Seattle, WA, USA
6. Vanderbilt University Medical Center, Department of Surgery and the Epithelial Biology Center, and the Nashville VA Medical Center, Nashville, TN, USA

Running title: *Helicobacter pylori* accelerates dysplasia

Keywords: infection, inflammation, gastric cancer, metaplasia, dysplasia

Correspondence to: Nina R. Salama, Fred Hutchinson Cancer Research Center, 1100 Fairview Ave North, Mail Stop C3-168, Seattle, WA 98109. [nsalama@fredhutch.org](mailto:nsalama@fredhutch.org) 206-667-1540 (office), 206-667-6524 (fax).

Disclosures: the authors declare that no conflict of interest exists.

Figures: 8

Tables: 1

1 **Abstract**

2

3 More than 80% of gastric cancer is attributable to stomach infection with *Helicobacter pylori*  
4 (*Hp*), even though the bacterium is not always present at time of diagnosis. Infection is thought  
5 to lead to cancer by promoting the accumulation of oncogenic mutations downstream of  
6 inflammation; once oncogenic pathways become activated, infection may become dispensable  
7 for cancer development. Gastric preneoplastic progression involves sequential changes to the  
8 tissue, including loss of parietal cells, spasmolytic polypeptide-expressing metaplasia (SPEM),  
9 intestinal metaplasia (IM) and dysplasia. In mice, active KRAS expression recapitulates these  
10 tissue changes in the absence of *Hp* infection. This model provides an experimental system to  
11 investigate whether *Hp* infection has additional roles in preneoplastic progression, beyond  
12 initiating inflammation. Mice were assessed by evaluating tissue histology, gene expression  
13 changes, the immune cell repertoire, and expression of metaplasia and dysplasia markers.  
14 Compared to *Hp*-/KRAS<sup>+</sup> mice, *Hp*<sup>+</sup>/KRAS<sup>+</sup> mice had i) severe T cell infiltration and altered  
15 macrophage polarization; ii) altered expression of metaplasia markers, including increased  
16 expression of CD44v9 (SPEM) and decreased expression of TFF3 (IM); iii) more dysplastic  
17 (TROP2<sup>+</sup>) glands; and iv) greater proliferation of metaplastic and dysplastic glands. *Hp* was able  
18 to persistently colonize the stomach during the onset of these tissue changes, and eradication of  
19 *Hp* with antibiotics prevented metaplastic, dysplastic and proliferation marker changes.  
20 Collectively, these results suggest that gastric preneoplastic progression differs between *Hp*<sup>+</sup> and  
21 *Hp*<sup>-</sup> cases, and that sustained *Hp* infection can promote the later stages of gastric preneoplastic  
22 progression, in addition to its established role in initiating chronic inflammation.

## 23 Introduction

24

25 About 13% of the global cancer burden in 2018 was attributable to carcinogenic  
26 infections <sup>1</sup>, and *Helicobacter pylori* (*Hp*)-associated gastric cancer accounted for the largest  
27 proportion of these cancers <sup>2</sup>. More than 77% of new gastric cancer cases, and more than 89% of  
28 new non-cardia gastric cancer cases, were attributable to infection with *Hp* <sup>1</sup>, a bacterium that  
29 colonizes the stomach of half the world's population <sup>3</sup>. However, *Hp* infection confers only a 1 to  
30 2% lifetime risk of developing stomach cancer <sup>4</sup> and thus a complex interplay between the  
31 bacterium and host is presumed to lead to cancer development in only some individuals.

32 The exact mechanisms through which *Hp* infection promotes gastric cancer remain  
33 largely elusive. *Hp* infection typically occurs during childhood and always causes chronic  
34 inflammation (gastritis) <sup>5</sup>. *Hp*-dependent chronic inflammation promotes the accumulation of  
35 reactive oxygen species and other toxic products that cause mutations in gastric epithelial cells <sup>6-</sup>  
36 <sup>8</sup>. Early studies using tissue histology rarely detected *Hp* in tumors, leading to a belief that *Hp*  
37 triggers the initial inflammatory insult in the stomach, but that *Hp* is essentially irrelevant by the  
38 time gastric cancer is detected; in other words, once chronic gastric inflammation develops and  
39 oncogenic pathways are activated, the presence of *Hp* is no longer necessary to promote  
40 metaplastic changes that lead to cancer. However, more sensitive molecular methods detect *Hp*  
41 in about half of tumors <sup>9-11</sup>, and eradication of *Hp* combined with tumor resection helps prevent  
42 tumor recurrence <sup>12</sup>, suggesting that *Hp* may promote the later stages of metaplasia and cancer  
43 development in at least some individuals.

44 Beyond eliciting oncogenic mutations, the mechanism(s) through which chronic gastritis  
45 might promote gastric cancer development is not well understood <sup>13</sup>. Humans generally develop  
46 a strong T<sub>h</sub>1 and T<sub>h</sub>17 immune response against *Hp* that helps control the infection <sup>14-16</sup>. This T  
47 cell response does not clear the infection and furthermore can drive immunopathology in the  
48 gastric mucosa <sup>17, 18</sup>, and *Hp* infection can disrupt normal T cell function through multiple  
49 mechanisms <sup>13, 19, 20</sup>. Thus, T cells can play both protective and detrimental roles during *Hp*  
50 stomach infection. More broadly, anticancer immunity in the context of gastric cancer is not well  
51 understood. A better understanding of how active *Hp* infection may impact gastric inflammation  
52 in the context of metaplasia and cancer development may lead to the discovery of new drug  
53 targets or therapeutic strategies.

54 The *Mist1-Kras* mouse is one of the only existing mouse models to recapitulate the  
55 progression from healthy gastric epithelium to spasmodic polypeptide-expressing metaplasia  
56 (SPEM), intestinal metaplasia (IM) and dysplasia<sup>21</sup>. This model utilizes KRAS, a GTPase  
57 signaling protein of the Ras (Rat Sarcoma) family that regulates cell survival, proliferation and  
58 differentiation<sup>22,23</sup>. Molecular profiling studies have shown that about 40% of gastric tumors  
59 have signatures of RAS activity<sup>24,25</sup>. In the mouse model, treatment with tamoxifen (TMX)  
60 induces the expression of a constitutively active *Kras* allele (G12D) in the gastric chief cells.  
61 Within one month, SPEM develops in 95% of corpus glands, and over the next three months  
62 progresses to IM<sup>21</sup>. Thus, active KRAS expression in mice serves as a tool to recapitulate  
63 changes that, in humans, are induced by years of inflammation due to *Hp* infection. We used  
64 *Mist1-Kras* mice to test our hypothesis that *Hp*, if present during metaplasia and dysplasia, could  
65 impact pathology. We found that sustained *Hp* infection coupled with active *KRAS* expression  
66 led to severe inflammation, altered metaplasia marker expression, and increased cell proliferation  
67 and dysplasia compared to *Hp*-/*KRAS*<sup>+</sup> mice. Thus, the course of gastric neoplastic progression  
68 may differ depending on whether *Hp* is present during the later stages of disease progression.

69

## 70 **Results**

71

### 72 *Hp* infection worsens gastric immunopathology in mice expressing active *KRAS*

73 To assess whether *Hp* impacts *KRAS*-driven metaplasia, we performed concomitant  
74 infection/induction experiments in *Mist1-Kras* mice. First mice were infected with *Hp*, or mock-  
75 infected, and the next day mice were treated with tamoxifen (TMX) to induce active *KRAS*  
76 expression in stomach chief cells, or sham-induced. After two, six or 12 weeks, mice were  
77 humanely euthanized and stomachs were aseptically harvested and used for downstream analyses  
78 (**Figure 1**). Formalin-fixed, paraffin-embedded tissue sections were used for histological analysis  
79 of the corpus (**Figure 2**), where active *KRAS* is expressed in TMX-induced *Mist1-Kras* mice.  
80 Compared to *Hp*-/*KRAS*<sup>-</sup> mice (**Figure 2A and B**), *Hp* infection alone caused modest  
81 inflammation at two weeks that increased over time, with loss of parietal cells by six weeks and  
82 moderate surface epithelial hyperplasia by 12 weeks (**Figure 2C and D**). Mice expressing active  
83 *KRAS* had far more striking changes to the tissue over time (**Figure 2E-H**). To quantify the  
84 effects of *Hp* infection in this model, a blinded analysis was performed to assess inflammation,



85 oxyntic atrophy (loss of parietal cells), and surface epithelial hyperplasia in active KRAS-  
86 expressing mice (Figure 3A-C).

87

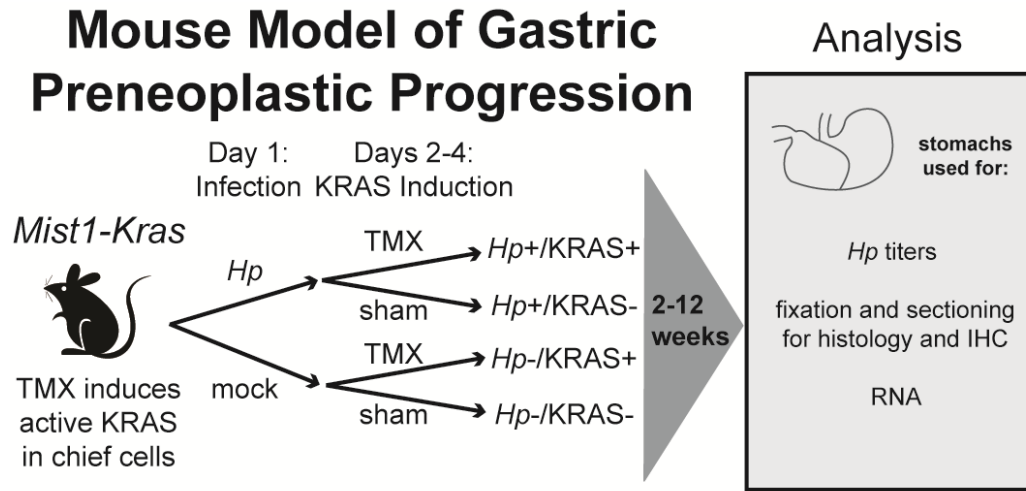

88

89 **Figure 1. *Mist1-Kras* mice were used to assess whether and how *Hp* infection alters gastric**  
90 **preneoplastic progression.** On day one, mice are infected with *H. pylori* (*Hp*) by oral gavage, or  
91 mock-infected. On days two through four, mice receive daily injections with tamoxifen (TMX)  
92 to induce a constitutively active *Kras* allele (G12D) in the chief cells (*Mist1*-expressing) of the  
93 stomach. After two, six or 12 weeks, mice are humanely euthanized and the glandular stomach  
94 (excluding forestomach region) is assessed as indicated.

95

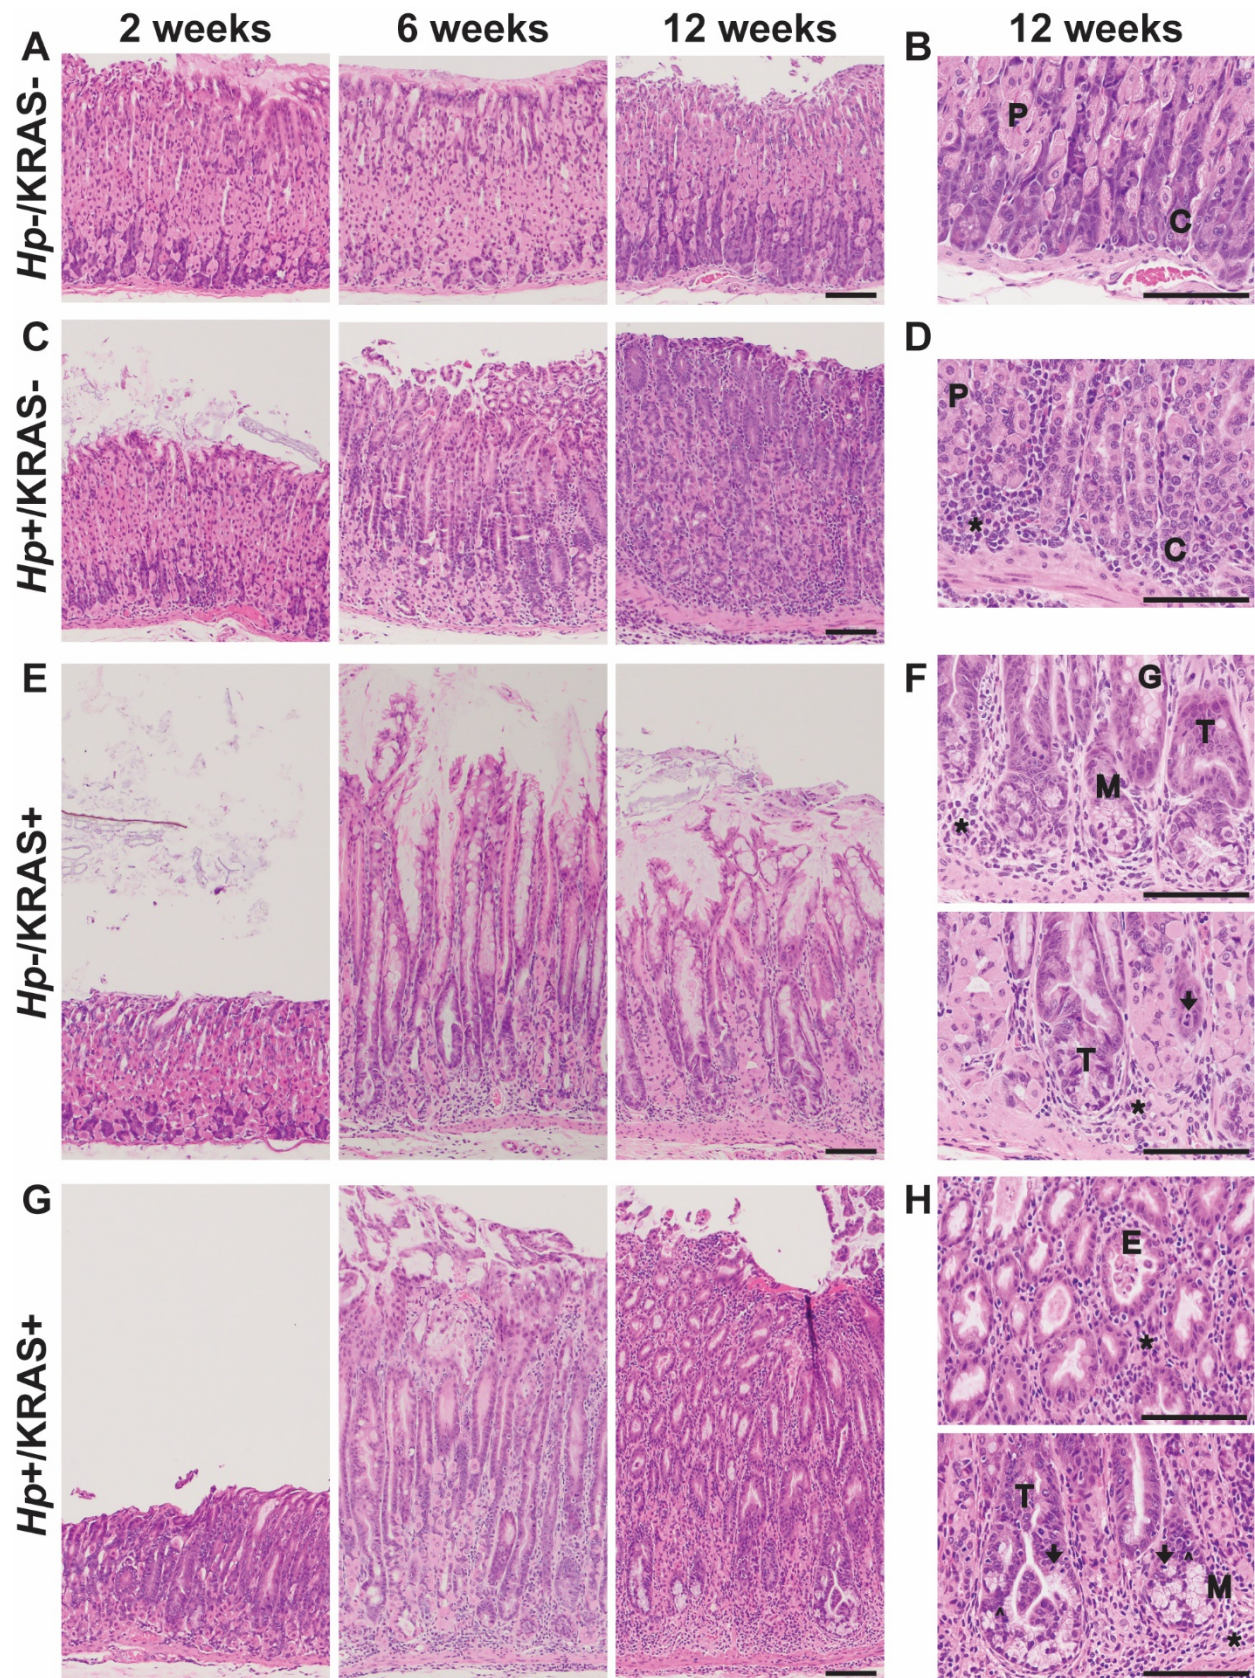



98 **Figure 2. Concomitant *Hp* infection and active KRAS expression changes tissue histology.**  
99 Shown are representative images of corpus tissue from formalin-fixed, paraffin-embedded,  
100 hematoxylin & eosin-stained sections from stomachs obtained from *Hp*-/KRAS- (**A and B**),  
101 *Hp*+/KRAS- (**C and D**), *Hp*-/KRAS+ (**E and F**), and *Hp*+/KRAS+ (**G and H**) mice (n=10-16  
102 per group) after two, six or 12 weeks as indicated. Scale bars, 100  $\mu$ m. Examples of the  
103 following morphological features are designated in the higher magnification images in **B, D, F**  
104 and **H**: chief cells (C); glandular ectasia (E); goblet-like cell morphology (G); hyperchromatic  
105 nuclei (carets); immune cells (asterisks); mitotic figures (arrows); mucus (M); parietal cells (P);  
106 tortuous glands (T).

107  
108 KRAS expression caused changes to the corpus epithelium that were apparent within two  
109 weeks, with a moderate degree of inflammation, surface epithelial hyperplasia, and some loss of  
110 parietal cells. These changes were slightly more severe in a subset of *Hp*+/KRAS+ mice, but  
111 overall there were no significant histological differences between *Hp*-/KRAS+ and *Hp*+KRAS+  
112 mice at this early time point (**Figure 2E and G**). By six weeks, each of these parameters became  
113 more severe, and notably, parietal cell loss was significantly greater in *Hp*+/KRAS+ mice  
114 compared to *Hp*-/KRAS+ mice (**Figure 3A**). By 12 weeks, *Hp*-/KRAS+ mice had mucinous  
115 cells, in line with previous observations<sup>21</sup> (**Figure 2F**). *Hp*+KRAS+ mice looked different from  
116 *Hp*-/KRAS+ mice, with loss of normal basal polarity of epithelial cells, and gland architecture  
117 that was severely disrupted, including forked or star-shaped gland structure indicative of  
118 extensive branching and disorganized maturation (**Figure 2G**). As well, these mice had  
119 hyperchromatic nuclei with variations in nuclear size, which can indicate dysplasia. Moreover, at  
120 12 weeks *Hp*+/KRAS+ mice had significantly increased inflammation, parietal cell loss and  
121 surface epithelial hyperplasia compared to *Hp*-/KRAS+ mice (**Figure 3A-C**). Finally, the overall  
122 histology score (histological activity index), which sums the above scores along with scores for  
123 other parameters like epithelial defects and hyalinosis (**Supplementary Figure S1**) and which  
124 thus indicates the degree of overall immunopathology<sup>26</sup>, was significantly increased in  
125 *Hp*+/KRAS+ mice compared to *Hp*-/KRAS+ mice at both six and 12 weeks (**Figure 3D**). Thus,  
126 concomitant *Hp* infection and active KRAS expression in the corpus leads to histopathological  
127 changes to the tissue within six weeks that become more severe by 12 weeks.

128

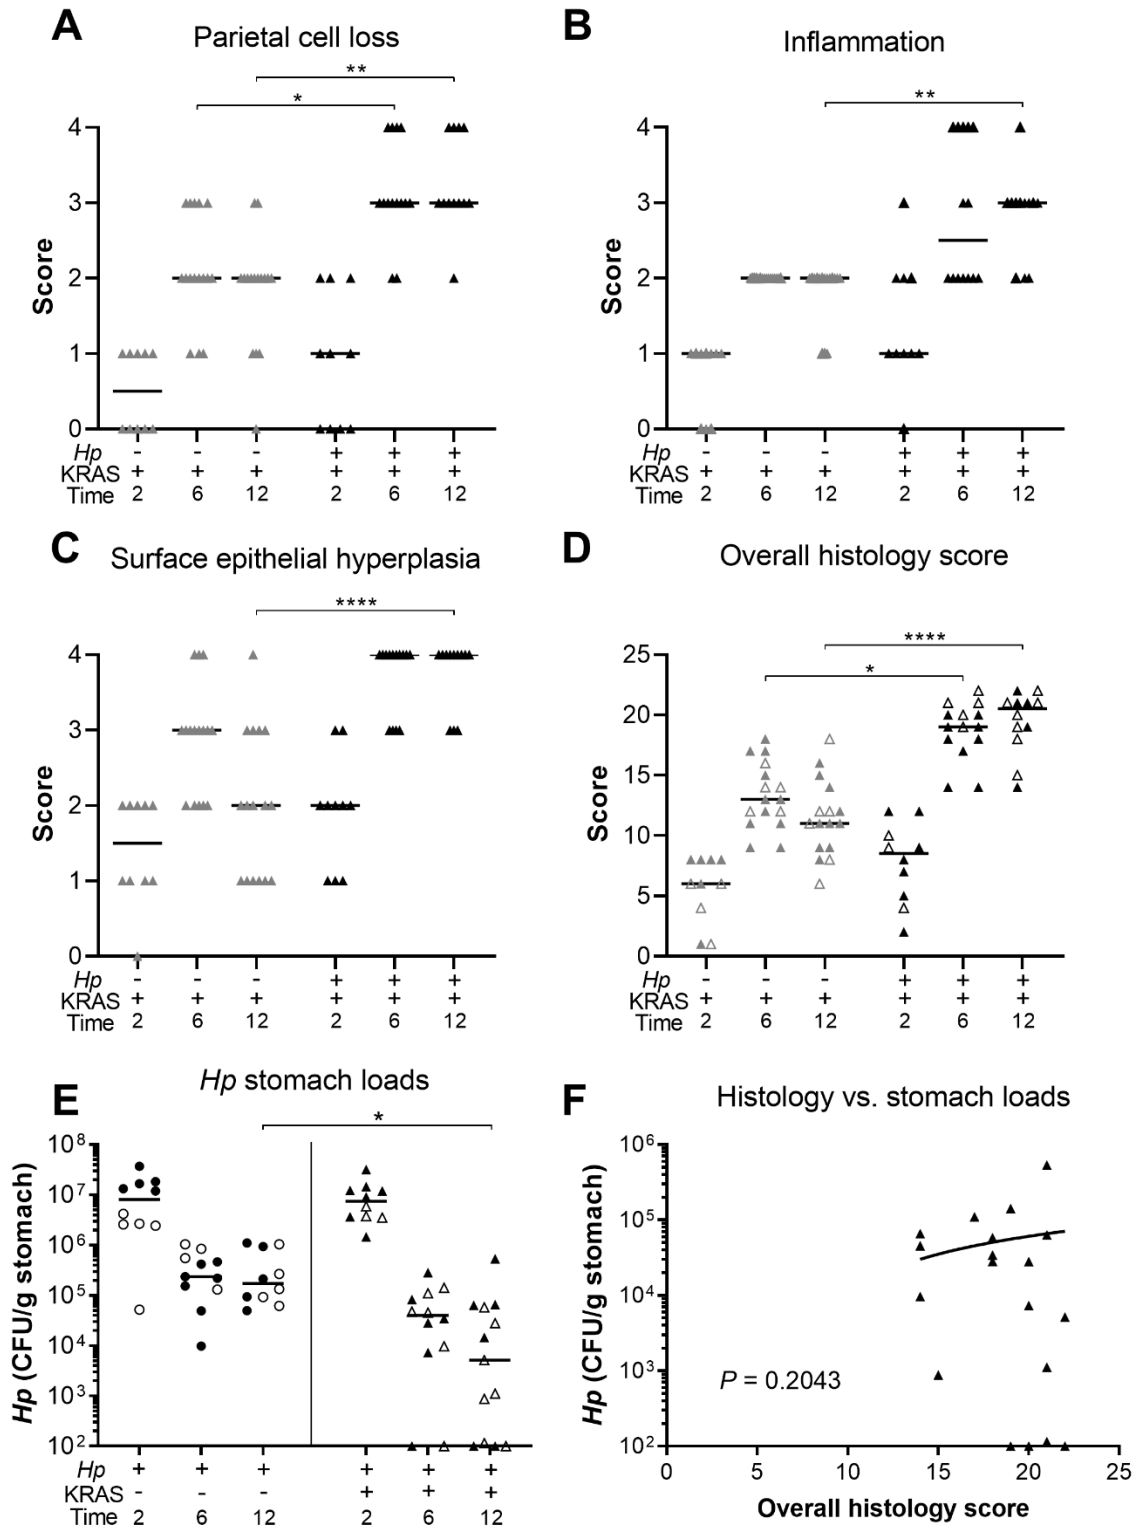

129

130

131

132

**Figure 3. *Hp*+/*KRAS*+ mice have severe gastric immunopathology marked by inflammation, loss of parietal cells and surface epithelial hyperplasia. Stomachs from n=10-16 mice per group were evaluated for tissue pathology and bacterial colonization. (A-D)**

133 Hematoxylin-and-eosin-stained corpus tissue was assessed for parietal cell loss (oxyntic atrophy)  
134 (A), inflammation (B), surface epithelial hyperplasia (C) and the composite histological activity  
135 index (D) in a blinded fashion using the Rogers criteria<sup>26</sup>. (E) *Hp* loads were assessed by  
136 quantitative culture; mice with no detectable colonization were plotted at the limit of detection.  
137 (F) Comparison of *Hp* loads and overall histology score (from D) from the same mouse at six or  
138 12 weeks. Significance was assessed by Spearman correlation. Data are combined from N=2  
139 independent mouse experiments per time point. Data points represent actual values for each  
140 individual mouse and bars indicate median values. Statistically significant comparisons are  
141 indicated by: \*  $P < 0.05$ , \*\*  $P < 0.01$ , \*\*\*\*  $P < 0.0001$ , Kruskal-Wallis test with Dunn's  
142 multiple test correction. CFU/g, colony-forming units per gram stomach tissue. In D and E, open  
143 vs. closed symbols distinguish between biological replicates.

144  
145 The striking inflammation seen in *Hp*+/*KRAS*+ mice compared to *Hp*+/*KRAS*- mice  
146 might be expected to eliminate *Hp* infection. However, *Hp* was recovered from most *KRAS*+  
147 mice by stomach culturing (Figure 3E), demonstrating that the bacterium could to some extent  
148 withstand the severe inflammation of the preneoplastic stomach. At two weeks, *Hp* titers were  
149 not significantly different between *Hp*+/*KRAS*- and *Hp*+/*KRAS*+ mice, suggesting that the early  
150 histopathological changes did not impact bacterial colonization. In sham-induced (*KRAS*-) mice,  
151 *Hp* titers were similar at six and 12 weeks, and in both cases were lower than at two weeks,  
152 likely due to the onset of adaptive immunity to control the infection. However, in *Hp*+/*KRAS*+  
153 mice, the contraction of the *Hp* population was greater, with *Hp* recovered from only ten out of  
154 12 animals at six weeks and ten out of 13 animals at 12 weeks. *Hp* could be detected within  
155 glands by immunofluorescence microscopy (Supplementary Figure S2). No differences in titer  
156 or overall histology score were observed between male and female mice. Interestingly, stomach  
157 *Hp* loads were not correlated with histology scores (Figure 3F). We therefore hypothesized that  
158 the host inflammatory response to *Hp* infection might contribute to *Hp*-dependent tissue changes.

159

### 160 *Hp* infection increases and alters *KRAS*-driven inflammation

161  
162 Activated *KRAS* expression itself elicits inflammation: by 12 weeks, the median corpus  
163 inflammation score in *Hp*-/*KRAS*+ mice was two (Figure 3B), denoting coalescing aggregates  
164 of inflammatory cells in the submucosa and/or mucosa<sup>26</sup>. In this histological evaluation, the  
165 addition of *Hp* significantly increased inflammation by 12 weeks ( $P < 0.01$ ), with the median  
166 score rising to three (denoting organized immune cell nodules in the submucosa and/or mucosa).  
167 To characterize the nature of the inflammation, gene expression changes at 12 weeks were

168 assessed with a NanoString mouse immunology panel (**Figure 4 and Supplementary Table**  
 169 **S2**). Transcripts of *Cd45*, a pan-immune cell marker, were significantly increased in *Hp+ /KRAS-*  
 170 mice and especially in *Hp+ /KRAS+* mice compared to *Hp-* mice (**Supplementary Figure S3**),  
 171 suggesting greater numbers of immune cells in infected mice. Of the 561 genes in  
 172 the panel, 60 had no detectable expression among any mice (n=25) and were excluded from  
 173 subsequent analysis. Hierarchical clustering was performed on the remaining 501 genes and  
 174 revealed distinct clustering of the treatment groups (**Figure 4A**). All *Hp+* mice clustered  
 175 separately from *Hp-* mice, demonstrating that infection had the greatest impact on gene  
 176 expression. Within both the *Hp+* and the *Hp-* cluster, *KRAS+* mice clustered separately from  
 177 *KRAS-* mice, suggesting that active *KRAS* expression also impacted inflammatory gene  
 178 expression, though to a lesser extent than *Hp* infection did.

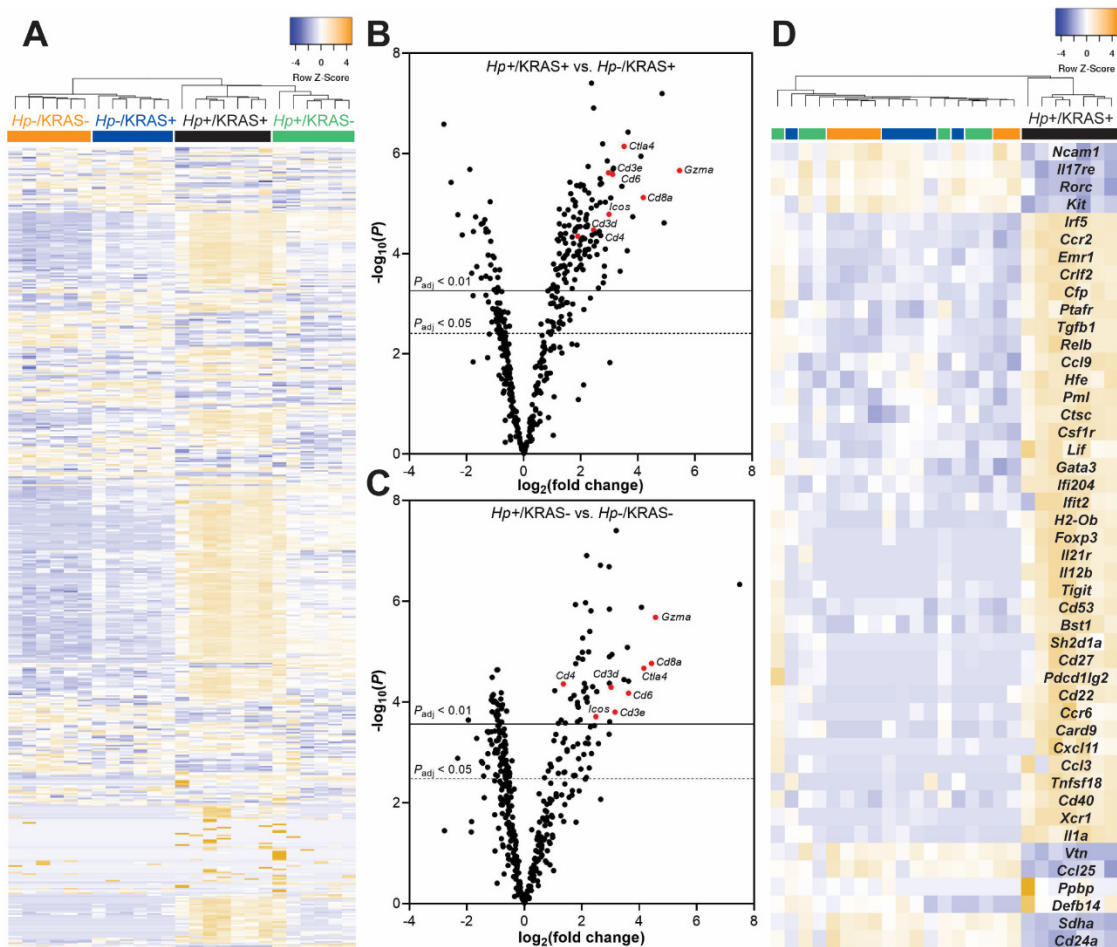

179 **Figure 4. A unique inflammatory gene signature exists in *Hp+ /KRAS+* mice at 12 weeks.**  
 180 RNA was extracted from stomach sections from *Hp+ /-*, *KRAS+ /-* mice at 12 weeks and immune-  
 181 related gene expression was detected with the NanoString nCounter Mouse Immunology Panel.  
 182 (A) Expression of 501 genes is shown. Colored bars denote different treatment groups. (B and  
 183

184 C) Volcano plots show the fold change and  $P$  values of all genes in the panel, for  $Hp+/KRAS+$   
185 mice vs.  $Hp-/KRAS+$  mice (B) and  $Hp+/KRAS-$  mice vs.  $Hp-/KRAS-$  mice (C). A subset of T  
186 cell-related genes is shown in red and labeled. Lines show genes meeting the threshold for  
187 significance after correction with the Benjamini-Yekutieli procedure. (D) Expression of 46 genes  
188 (see text) that were uniquely differentially expressed in  $Hp+/KRAS+$  mice vs. all other groups is  
189 shown. The dendrograms at the top of the heat maps were produced by hierarchical clustering of  
190 gene expression. Data comes from N=1 NanoString experiment with n=6-7 mice per group from  
191 N=2 independent mouse experiments.

192  
193 Next we assessed gene expression patterns in the different mouse groups. Compared to  
194  $Hp-/KRAS+$  mice,  $Hp+/KRAS+$  mice had 235 significantly differentially expressed genes  
195 (DEGs) ( $P_{\text{adjusted}} < 0.05$ ) (Figure 4B). Several of the most highly upregulated genes, including  
196 *Cd3d*, *Cd3e*, *Cd4*, *Cd8a*, *Gzma*, *Ctla4*, *Icos* and *Cd6*, implicated a strong T cell response, in  
197 accordance with previous studies in humans and naive animal models<sup>27,28</sup>. Likewise, compared  
198 to  $Hp-/KRAS-$  mice,  $Hp+/KRAS-$  mice had 177 DEGs, with *Cd3d*, *Cd3e*, *Cd4*, *Cd8a*, *Gzma*,  
199 *Ctla4*, *Icos* and *Cd6* once again highly significantly differentially expressed (Figure 4C). Thus,  
200 many of the gene expression differences seen in  $Hp+/KRAS+$  mice vs.  $Hp-/KRAS+$  mice are  
201 likely reflective of a general pattern of  $Hp$ -mediated inflammation that is independent of the  
202 metaplastic state of the tissue. However, we identified a unique inflammatory gene signature in  
203  $Hp+/KRAS+$  mice (Figure 4D), demonstrating that the inflammation observed in this group is  
204 not only of a greater magnitude than in the other groups, but also of a different nature. We  
205 identified 46 genes whose expression (normalized to  $Hp-/KRAS-$  mice) was >2-fold increased or  
206 decreased in  $Hp+/KRAS+$  mice, but <1.5-fold increased or decreased in  $Hp+/KRAS-$  and  $Hp-$   
207  $/KRAS+$  mice. Many of these genes implicated T cells (*Ccr6*, *Cd27*, *Cd53*, *Cxcl11*, *Foxp3*,  
208 *Gata3*, *Il12b*, *Pdcd1lg2* [PD-L2], *Tigit*, and *Tnfsf18* upregulated; *Il17re* downregulated) and  
209 macrophages (*Ccl3*, *Csf1r*, *Emr1* [F4/80], *Il1a* and *Irf5* upregulated). As well, most markers of T  
210 cell exhaustion<sup>29,30</sup> were only strongly expressed in  $Hp+/KRAS+$  mice (Supplementary Figure  
211 S4). Thus, even though both  $Hp+/KRAS+$  mice and  $Hp+/KRAS-$  mice had significant  
212 upregulation of T cell-related genes compared to their  $Hp-$  counterparts, the addition of active  
213 KRAS may impact the nature of T cell polarization and function.

214 In animal models, immune pressure due to chronic  $Hp$  infection results in loss of function  
215 of the  $Hp$  type IV secretion system (T4SS)<sup>31</sup>.  $Hp$  strains isolated from long-term experimental  
216 infections of C57BL/6 mice (but not *Rag1* mice deficient in adaptive immune responses), gerbils  
217 and monkeys lose their ability to elicit IL-8 secretion by gastric epithelial cells *in vitro*<sup>31</sup>. In line



218 with these observations, we found that approximately 50% of *Hp* strains isolated from 12+ week  
219 infections of KRAS- mice had lost their T4SS activity (**Supplementary Figure S5**).

220 Surprisingly, *Hp* strains isolated from KRAS+ mice were no more likely to lose their T4SS  
221 activity, despite the severe inflammation seen in these animals.

222

223 *Hp+/KRAS+ mice have T cells throughout the lamina propria and fewer M2 macrophages*

224

225 To detect immune cell subsets in the corpus of *Hp-/KRAS+* vs. *Hp+/KRAS+* mice at 12  
226 weeks, we performed multiplex fluorescent immunohistochemistry (IHC) with the following  
227 markers: for T cells, CD3, CD4, CD8 $\alpha$ , FOXP3 (regulatory T cell marker) and PD-1 (T cell  
228 exhaustion marker); for macrophages, F4/80 and the polarization markers MHC class II (M1  
229 macrophages) and CD163 (M2 macrophages) (**Figure 5**). HALO software was used to detect and  
230 enumerate immune cell subsets (**Supplementary Figure S6**). In *Hp-/KRAS+* mice we detected  
231 moderate numbers of CD3+ T cells, most of which were CD4+, and a few of which were CD8 $\alpha$ +  
232 (**Figure 5A and Supplementary Figure S6A**). *Hp+/KRAS+* mice had significantly more CD3+  
233 T cells, but the proportion of CD4+ vs. CD8 $\alpha$ + cells was similar, with more CD4+ than CD8 $\alpha$ +  
234 cells. Interestingly, most of the CD3+ cells in *Hp-/KRAS+* mice expressed FOXP3 and PD-1  
235 (**Figure 5B**), suggesting they may be activated regulatory T cells<sup>32</sup>. In *Hp+/KRAS+* mice, there  
236 were significantly more FOXP3+ cells (**Supplementary Figure S6A**), some of which were PD-1  
237 double-positive (**Figure 5B**). However, many CD3+ cells did not express either of these markers,  
238 suggesting they may be different T cell subsets than are found in *Hp-/KRAS+* mice, and/or NK  
239 cells. Cell localization was also different between treatment groups: in *Hp-/KRAS+* mice, most T  
240 cells were located at the base of the glands, whereas in *Hp+/KRAS+* mice, T cells were located  
241 throughout the glands. Finally, both groups of mice had F4/80+ cells throughout the lamina  
242 propria (**Figure 5C and Supplementary Figure S6B**), suggesting presence of macrophages or  
243 eosinophils<sup>33</sup>. We previously found that M2 macrophages promoted SPEM progression in mice  
244 and were associated with human SPEM and IM<sup>34</sup>. In *Hp-/KRAS+* mice, some F4/80+ cells were  
245 dual-positive for the M2 polarization marker CD163, in line with previous findings<sup>21</sup>, and some  
246 were dual-positive for the M1 polarization marker MHC class II. *Hp+/KRAS+* mice had similar  
247 numbers of F4/80+/MHC class II+ cells present, but significantly fewer F4/80+/CD163+ cells  
248 (**Supplementary Figure S6B**), suggesting altered macrophage polarization; most CD163 signal



249 was observed in the gland lumen, likely non-specific staining due to mucus binding. These IHC  
250 experiments confirm our gene expression-based findings that inflammation in *Hp*<sup>+</sup>/KRAS<sup>+</sup> mice  
251 is not only more severe than in *Hp*<sup>-</sup>/KRAS<sup>+</sup> mice, but is also altered in nature.

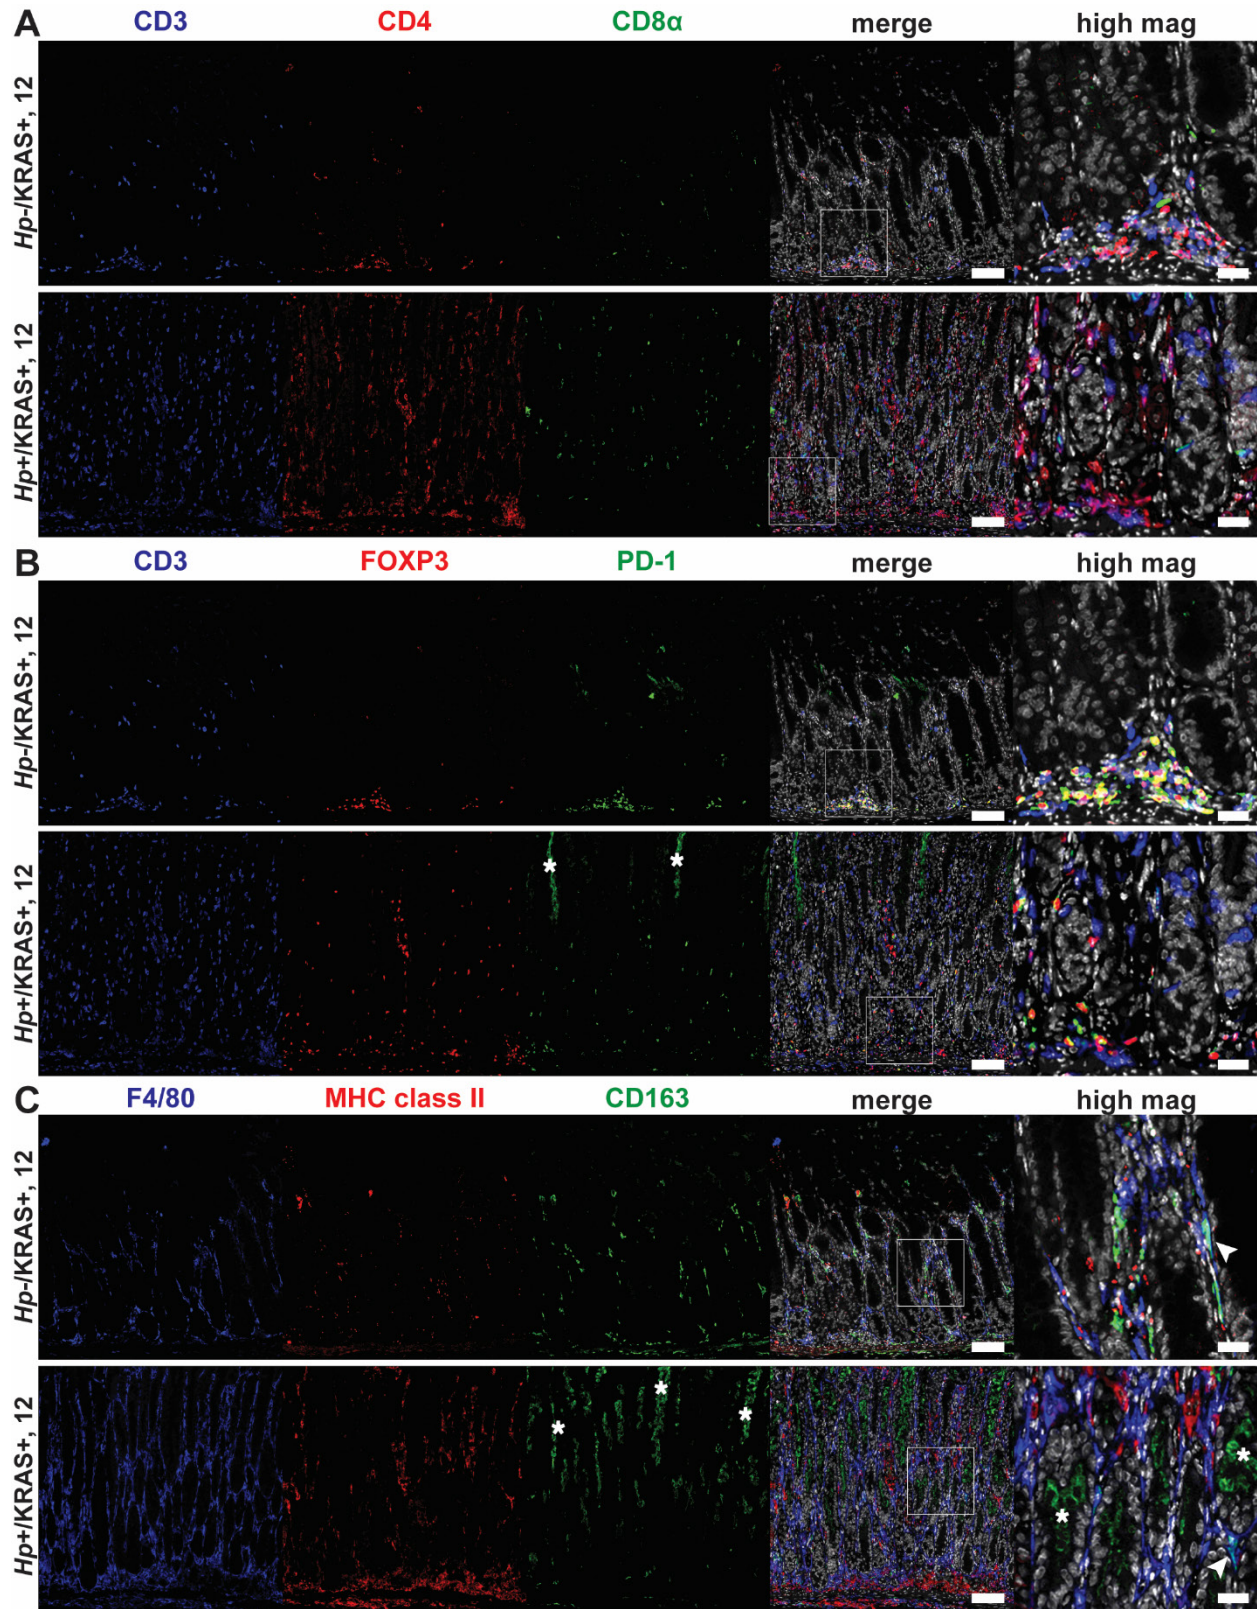

252

253

254

**Figure 5. Multiplex immunohistochemistry demonstrates more T cells and fewer M2 macrophages in *Hp*<sup>+</sup>/*KRAS*<sup>+</sup> mice.** Corpus tissue from *Hp*<sup>-</sup>/*KRAS*<sup>+</sup> and *Hp*<sup>+</sup>/*KRAS*<sup>+</sup> mice

255 obtained after 12 weeks was assessed by multiplex immunohistochemistry and representative  
256 images are shown. White boxes denote regions shown at higher magnification. (A) CD3 suggests  
257 T cells, CD4 indicates helper T cells, CD8 $\alpha$  indicates cytotoxic T cells. (B) CD3 suggests T  
258 cells, FOXP3 indicates regulatory T cells, PD-1 is a marker of exhausted T cells. (C) F4/80  
259 suggests macrophages, MHC class II indicates M1 macrophages, CD163 indicates M2  
260 macrophages, arrowhead indicates an F4/80+/CD163+ cell. Scale bars for low magnification  
261 (“merge”) images, 100  $\mu$ m; for high magnification images, 25  $\mu$ m. Data are from N=1 multiplex  
262 immunohistochemistry experiment, with n=7 mice per group from N=2 independent mouse  
263 experiments. Asterisks denote examples of non-specific staining as determined by luminal  
264 location, lack of DAPI signal and lack of co-localization with relevant markers (B, CD3 and C,  
265 F4/80).  
266

### 267 *Hp infection alters metaplasia marker expression*

268

269 We wondered whether the changes in tissue histology observed in *Hp*+/*KRAS*+ mice  
270 (Figure 2) reflected changes to the nature of metaplasia in these mice. To detect differences in  
271 hyperplasia, metaplasia and cell proliferation in corpus tissue from *Hp*+/*KRAS*+ vs. *Hp*-/*KRAS*+  
272 mice over time (Figure 6A-C), we used: conjugated lectin from *Ulex europaeus* (UEA-I), which  
273 binds alpha-L-fucose, to detect foveolar (pit cell) hyperplasia; conjugated *Griffonia simplicifolia*  
274 lectin II (GS-II), which binds  $\alpha$ - or  $\beta$ -linked N-acetyl-D-glucosamine, to detect mucous neck  
275 cells and SPEM cells; anti-CD44v10 (orthologous to human CD44v9, referred to herein as  
276 “CD44v”) to detect SPEM cells<sup>35</sup>; anti-TFF3 and anti-MUC2 to detect IM (goblet) cells<sup>36</sup>  
277 (verified by staining of mouse intestine as shown in Supplementary Figure S7); and anti-KI-67  
278 to detect proliferating cells. We assessed differences through quantitative and semi-quantitative  
279 analysis of three to five images per mouse (Figure 6D-H). No difference was observed in UEA-I  
280 staining among the treatment groups (Supplementary Figure S8), suggesting that *Hp* infection  
281 did not impact foveolar hyperplasia development in this model. In *Hp*-/*KRAS*+ mice, GS-II  
282 staining was observed at the base of the glands at six weeks, co-localizing with CD44v,  
283 demonstrating SPEM (Figure 6A, D, E). As well, most mice had robust, cell-associated TFF3  
284 staining (Figure 6A and F) and a low degree of MUC2 staining (Figure 6B and G), suggestive  
285 of early IM. At 12 weeks, CD44v and GS-II staining was reduced, TFF3 staining remained  
286 robust, and the percentage of MUC2+ glands increased, suggesting a transition from SPEM to  
287 IM in these mice, consistent with previous findings<sup>21</sup>. In *Hp*+/*KRAS*+ mice, GS-II and MUC2  
288 staining patterns were similar, with GS-II decreasing and MUC2 increasing between six and 12  
289 weeks (Figure 6A, B, D, G). However, CD44v and TFF3 exhibited a different pattern. At six



290 weeks, *Hp*+/*KRAS*+ mice had greater CD44v staining and less TFF3 staining compared to *Hp*-  
 291 /*KRAS*+ mice (**Figure 6A, E, F**). By 12 weeks, CD44v staining waned somewhat but remained  
 292 higher than in *Hp*-/*KRAS*+ mice, and TFF3 staining further diminished compared to *Hp*-  
 293 /*KRAS*+ mice. Taken together, these results demonstrate that *Hp* infection alters the kinetics of  
 294 metaplasia development in *KRAS*+ mice. Metaplasia marker expression was not detected in  
 295 *KRAS*- mice (**Supplementary Figure S9**). Of note, no differences in immunostaining patterns  
 296 or quantification were observed in *KRAS*+ mice at two weeks (**Supplementary Figure S10**),  
 297 suggesting that *Hp*-driven metaplastic changes take longer than two weeks to become apparent.

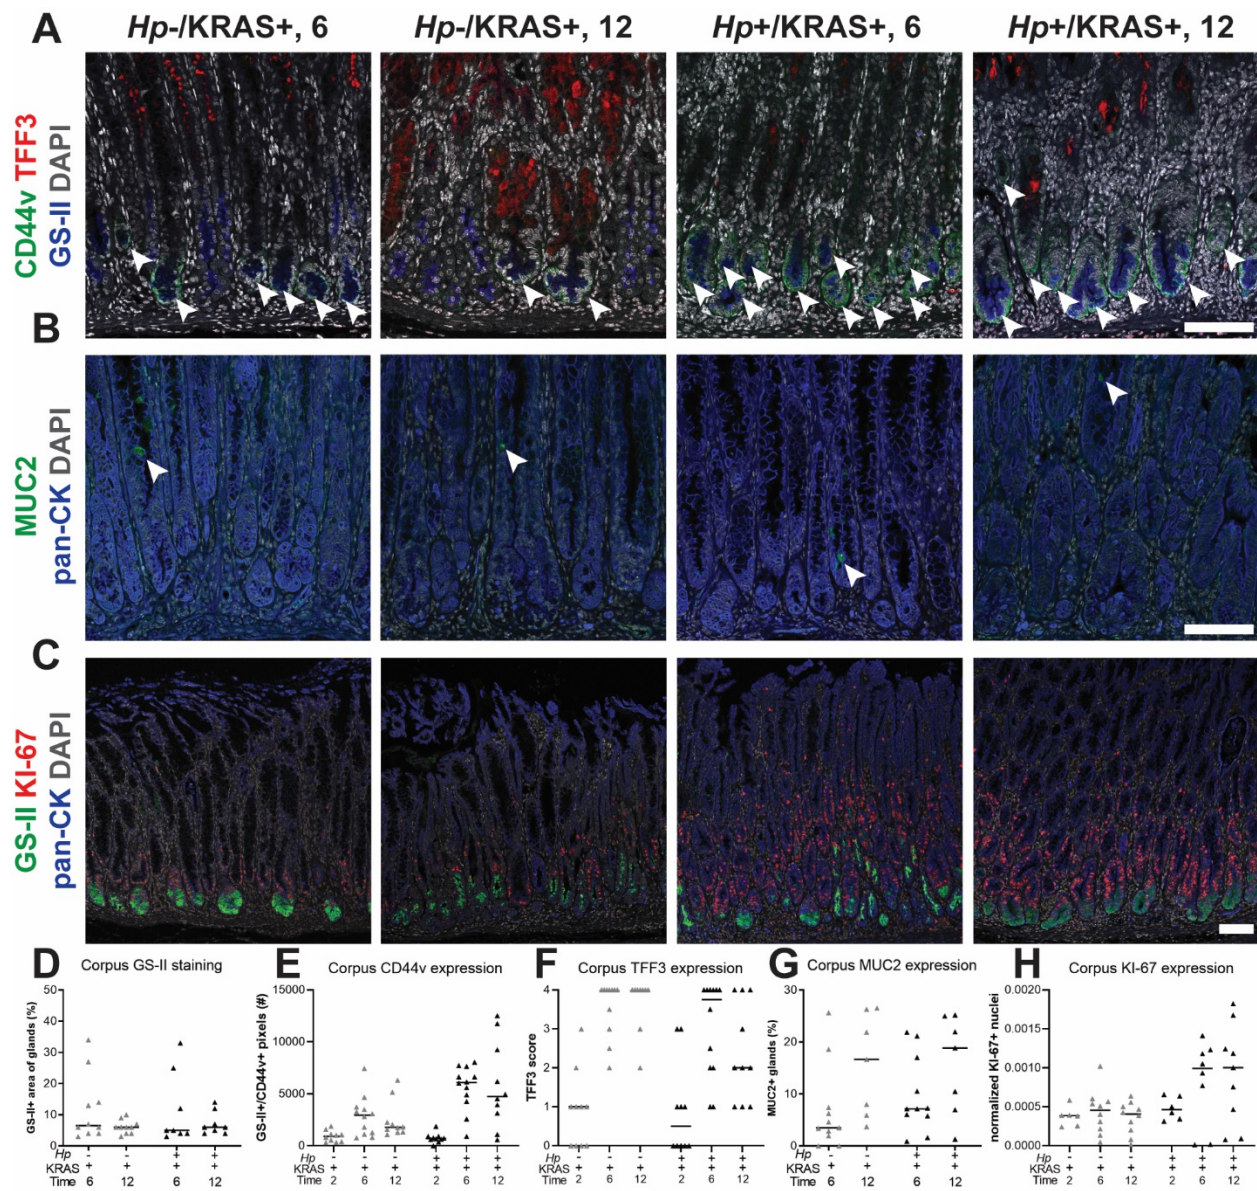

298

299 **Figure 6. The kinetics and molecular nature of metaplasia development are altered in**  
 300 *Hp*+/*KRAS*+ mice. Corpus tissue from *Hp*-/*KRAS*+ and *Hp*+/*KRAS*+ mice obtained after two,

301 six or 12 weeks (N=2 independent mouse experiments per time point and n=6-12 mice per  
302 group) was assessed for metaplasia via immunofluorescence microscopy. (A-C) Representative  
303 images are shown and scale bars are 100  $\mu$ m. (A) Stomachs were stained with antibodies against  
304 CD44v (green; arrowheads) and TFF3 (red), the lectin GS-II (blue) and DAPI (grey) in N=3  
305 staining experiments. (B) Stomachs were stained with antibodies against MUC2 (green;  
306 arrowheads) and pan-cytokeratin (blue) and DAPI (grey) in N=2 staining experiments. (C)  
307 Stomachs were stained with antibodies against KI-67 (red) and pan-cytokeratin (blue), the lectin  
308 GS-II (green) and DAPI (grey) in N=3 experiments. (D-H) Three to five representative images  
309 per mouse were quantitatively or semi-quantitatively assessed and the median value for each  
310 mouse is plotted. Bars on the graphs indicate the median value for each mouse group. (D) The  
311 percentage of cytokeratin-positive epithelial tissue that was dual-positive for GS-II staining was  
312 detected. (E) The number of GS-II+/CD44v+ pixels per image was quantified. (F) TFF3 staining  
313 was semi-quantitatively scored in a blinded fashion. Non-specific staining was not included in  
314 the score (see **Figure S9**). (G) The percentage of MUC2+ glands was determined by counting.  
315 (H) KI-67+/DAPI+ nuclei were enumerated and normalized to the DAPI content (total number  
316 of DAPI+ pixels) of each image.

317  
318 We observed mitotic figures in KRAS+ mice at 12 weeks (**Figure 2F and H**), suggesting  
319 increased cell division. Previously, patients with intestinal metaplasia were found to have  
320 significantly increased cellular proliferation (assessed by KI-67 staining) in biopsy tissue  
321 compared to healthy controls and patients with chronic active gastritis<sup>37</sup>. Here we found  
322 substantially more KI-67+ nuclei in corpus tissue of *Hp*+/*KRAS*+ mice than *Hp*-/*KRAS*+ mice at  
323 both six and 12 weeks (**Figure 6C and H**). Most KI-67+ cells were found within the glandular  
324 epithelial compartment, not in the lamina propria, and interestingly, the localization of KI-67+  
325 cells was altered in *KRAS*+ mice. In *KRAS*- mice, proliferating cells were found in the middle  
326 of the glands, where gastric stem cells are found (**Supplementary Figure S9B**). We observed  
327 that KI-67+ cells localized toward the base of the glands in *Hp*-/*KRAS*+ mice (**Figure 6C**). In  
328 *Hp*+/*KRAS*+ mice, KI-67 cells were abundant toward the base of the glands and higher up into  
329 the middle of the glands. In both groups of mice, some KI-67+ nuclei were found in GS-II+ cells  
330 at the base of the glands, suggesting proliferation of SPEM cells. However, in *Hp*+/*KRAS*+ mice  
331 most KI-67+ nuclei were found above GS-II+ cells, suggesting proliferation of additional cell  
332 types beyond those with a SPEM phenotype.

333

334 *Hp* infection increases dysplasia and cancer-associated gene expression

335

336 Overexpression of the calcium signal transducer TROP2 has been implicated in a variety  
337 of cancers<sup>38</sup>, including gastric cancer, where it is associated with worse outcomes<sup>39</sup>. Notably,

338 TROP2 expression was recently identified as a strong indicator of the transition from incomplete  
339 IM to gastric dysplasia in *Mist1-Kras* mice and in human samples<sup>40</sup>. We observed TROP2+  
340 corpus glands by immunofluorescence microscopy at six and 12 weeks (**Figure 7A and**  
341 **Supplementary Figure S11**). Quantitation using collagen VI as a gland segmentation marker  
342 revealed that *Hp*-/*KRAS*+ mice had TROP2 expression in 0 to 3.6% of glands at six weeks, and  
343 0 to 4.9% of glands at 12 weeks (**Figure 7B and Supplementary Figure S11**). *Hp*+/*KRAS*+  
344 mice had similar TROP2 expression at six weeks (0.5 to 2.5% of glands), but at 12 weeks had  
345 significantly more TROP2+ glands (1.5 to 9.1%,  $P < 0.05$ ). Thus, the addition of *Hp*  
346 significantly increased the percentage of TROP2+ glands in the corpus at 12 weeks. In all mice,  
347 most regions of TROP2 staining co-localized with KI-67 staining, suggesting proliferation of  
348 dysplastic glands. Only a few TROP2+ regions did not harbor KI-67+ cells (**Figure 7A,**  
349 asterisk). However, the association between TROP2 and Ki67 was greatest in *Hp*+/*KRAS*+ mice  
350 at 12 weeks, where a median of 86% of TROP2+ glands or gland fragments were KI-67+ ( $P <$   
351 0.01) (**Figure 7C**), suggesting that *Hp* infection increases the proliferation of dysplastic glands.



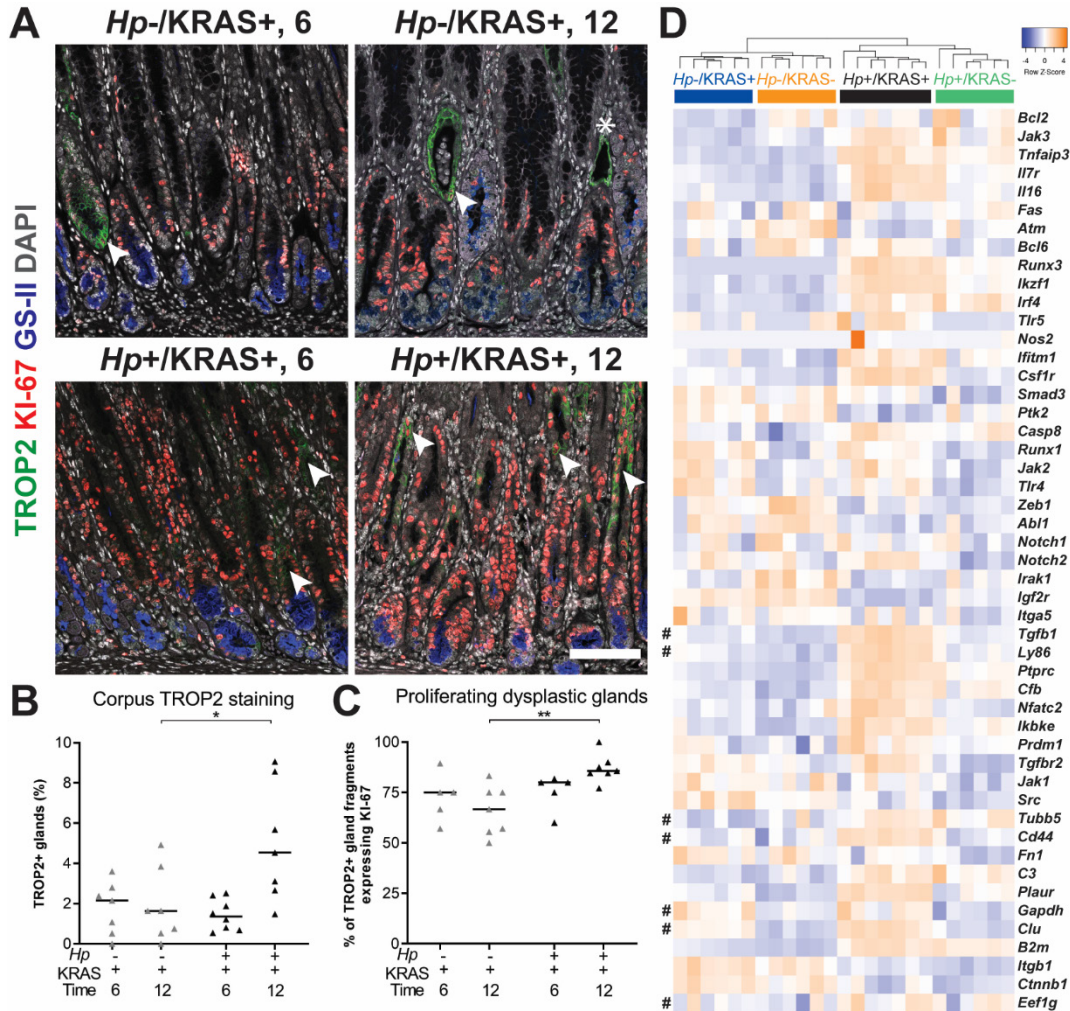

352  
 353 **Figure 7. *Hp* infection increases dysplasia and cancer gene expression in KRAS+ mice.**  
 354 Stomachs from *Hp*-/KRAS+ and *Hp*+/KRAS+ mice were assessed through immunofluorescence  
 355 microscopy (A-C) and gene expression analysis (D). (A-C) Corpus tissue from *Hp*-/KRAS+ and  
 356 *Hp*+/KRAS+ mice obtained after six or 12 weeks (N=2 independent mouse experiments per time  
 357 point and n=5-8 mice per group) was stained with antibodies against TROP2 (green) and KI-67  
 358 (red), the lectin GS-II (blue) and DAPI (grey). (A) Representative images are shown, arrows  
 359 show TROP2+/KI-67+ gland fragments, and the asterisk shows a TROP2+/KI-67- gland  
 360 fragment. Scale bar, 100  $\mu$ m. (B) TROP2+ gland fragments were enumerated as a percentage of  
 361 total gland fragments detected. (C) TROP2+ glands or gland fragments were assessed for KI-67  
 362 staining and the percentage of dual-positive gland fragments is shown. Statistically significant  
 363 comparisons are indicated by: \*  $P < 0.05$ , \*\*  $P < 0.01$ , Kruskal-Wallis test with Dunn's  
 364 correction. (D) The expression of gastric cancer-associated genes discovered through literature  
 365 searching is shown. RNA was extracted from stomach sections from *Hp*+/-, KRAS+/- mice at 12  
 366 weeks and gene expression was detected with the NanoString nCounter Mouse Immunology  
 367 Panel. The dendrogram was produced by hierarchical clustering of gene expression and colored  
 368 bars denote different treatment groups. Data comes from N=1 NanoString experiment with n=6-7  
 369 mice per group from N=2 independent mouse experiments. # denotes genes expressed in *Mist1-*  
 370 *Kras* organoids<sup>41</sup>.

371 We mined our NanoString gene expression data (**Figure 4A**) and identified 49 genes  
372 implicated in the development of gastrointestinal cancers<sup>41-46</sup>. Hierarchical clustering analysis  
373 showed that as with the overall panel, *Hp* infection status had the greatest impact on expression  
374 of this subset of genes at 12 weeks, and that active KRAS expression also impacted gene  
375 expression, though to a lesser extent than *Hp* infection status did (**Figure 7D**). However, some  
376 genes, such as *Jak2*, *Notch2* and *Runx1*, were upregulated in KRAS+ mice regardless of  
377 infection status. Finally, metaplastic and dysplastic organoids generated from *Hp*-/KRAS+ mice  
378 at 12 and 16 weeks after active KRAS induction, respectively, were previously found to have  
379 unique phenotypes and gene expression signatures<sup>41</sup>. Seven of these genes were found in our  
380 panel (**Figure 7D**, denoted with #). Expression of the metaplasia-associated gene *Clu* was  
381 strongly upregulated in KRAS+ mice, but the metaplasia-associated gene *Ly86* was only strongly  
382 expressed in *Hp*+ /KRAS+ mice. Of the dysplasia-associated genes, *Tubb5* was elevated in *Hp*+  
383 mice, *Gapdh* was elevated in KRAS+ mice, and *Eef1g* was not differentially expressed among  
384 treatment groups. Finally, *Cd44* and *Tgfb1* were previously found in both metaplastic and  
385 dysplastic organoids<sup>41</sup> and in our study were strongly elevated in *Hp*+ /KRAS+ mice at 12 weeks  
386 relative to the other mouse groups. Thus, gene expression in *Hp*+ /KRAS+ whole stomachs at 12  
387 weeks is distinct from *Hp*-/KRAS+ organoids generated at either 12 or 16 weeks, further  
388 supporting the hypothesis that concomitant *Hp* infection and active KRAS expression results in a  
389 unique gastric environment that is distinct from either *Hp*-/KRAS+ or *Hp*+ /KRAS- mice.

390

391 *Sustained Hp infection is necessary to elicit changes to metaplasia, dysplasia and cell*  
392 *proliferation*

393

394 Finally, we tested the impact of antibiotic eradication of *Hp* in two lines of experiments  
395 (**Figure 8 and Supplementary Figure S12**). First mice were infected with *Hp* or mock-infected,  
396 and active KRAS was induced. Starting at two weeks after active KRAS induction, mice  
397 received two weeks of “triple therapy” of tetracycline, metronidazole and bismuth<sup>47</sup> or vehicle  
398 (water) as a control, and were euthanized at six weeks (**Figure 8A and B**). Notably,  
399 *Hp*+ /KRAS+ mice that received triple therapy had low CD44v (**Figure 8A and C**) and high  
400 TFF3 (**Figure 8A and D**) expression, similar to *Hp*-/KRAS+ mice (whether untreated as in  
401 **Figure 6E-F**, or treated with triple therapy or water). Thus, eradication of *Hp* early in the course



402 of infection prevents the altered course of metaplasia seen at six weeks. Similarly, we tested the  
403 effects of triple therapy after six weeks (a time point where significant *Hp*-dependent changes to  
404 the tissue are already evident) with euthanasia at 12 weeks (**Figure 8E and F**). *Hp*<sup>+</sup>/KRAS<sup>+</sup>  
405 mice that received triple therapy had reduced TROP2<sup>+</sup> glands at 12 weeks (**Figure 8E and G**),  
406 suggesting that sustained *Hp* presence is necessary to accelerate dysplasia in this model. Finally,  
407 we found that at both time points antibiotic-treated *Hp*<sup>+</sup>/KRAS<sup>+</sup> mice had reduced KI-67  
408 staining (**Figure 8B, F and H**), demonstrating that sustained *Hp* presence is also required for the  
409 hyperproliferation phenotype in *Hp*<sup>+</sup>/KRAS<sup>+</sup> mice.  
410

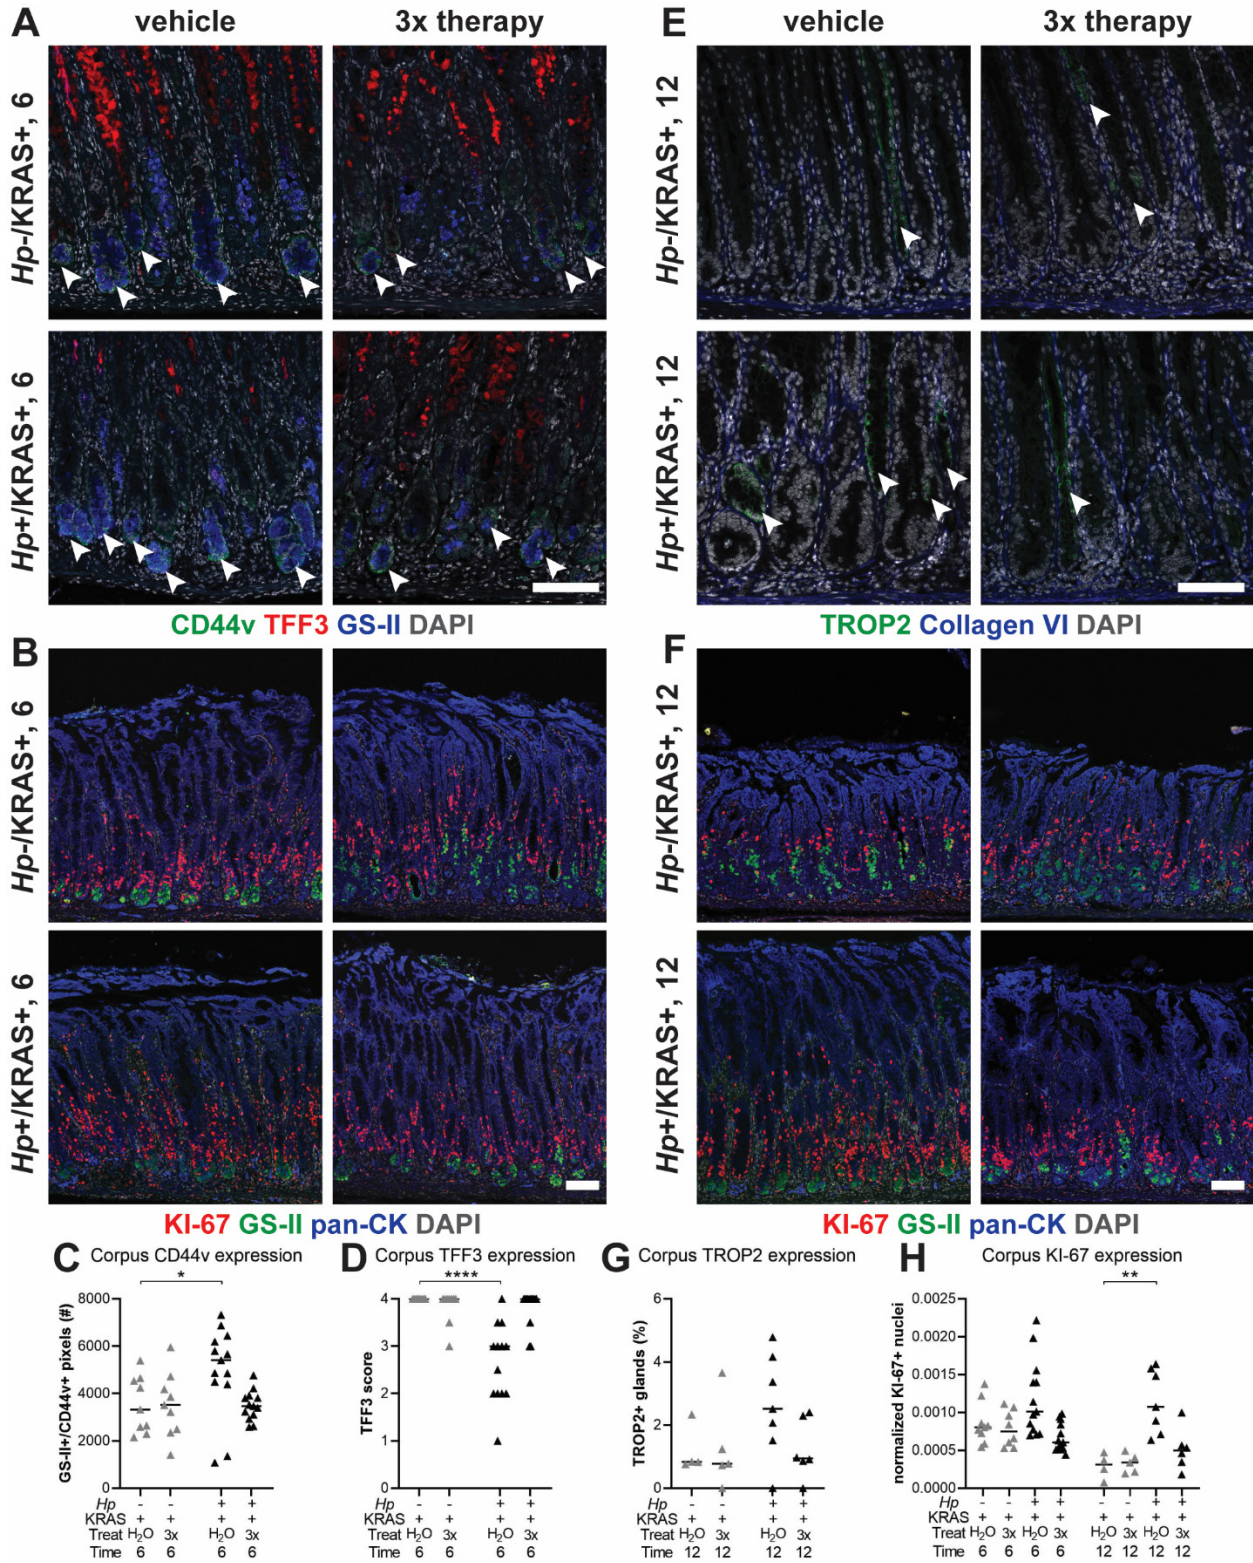

411  
 412 **Figure 8. Antibiotic eradication prevents *Hp*-associated changes in *Hp*+/*KRAS*<sup>+</sup> mice.** First,  
 413 mice were infected with *Hp* or mock-infected, then active *KRAS* was induced. Starting at two  
 414 weeks (A-D) or six weeks (E-G), mice received two weeks of daily antibiotic therapy (triple

415 therapy of tetracycline, metronidazole and bismuth, “3x”) or vehicle control (“H<sub>2</sub>O”) Mice were  
416 euthanized after six (**A-D**) or 12 (**E-G**) weeks and immunofluorescence microscopy was used to  
417 assess tissue phenotypes. (**A**) Stomachs were stained with antibodies against CD44v (green,  
418 arrowheads) and TFF3 (red), the lectin GS-II (blue) and DAPI (grey) in N=1 staining  
419 experiment. (**E**) Stomachs were stained with antibodies against TROP2 (green, arrowheads) and  
420 collagen VI (blue) and DAPI (grey) in N=1 staining experiment. (**B and F**) Stomachs were  
421 stained with antibodies against KI-67 (red) and pan-cytokeratin (blue), the lectin GS-II (green)  
422 and DAPI (grey) in N=2 staining experiments. (**C, D, G, H**) Three to five representative images  
423 per mouse were quantitatively or semi-quantitatively assessed and the median value for each  
424 mouse is plotted. Bars on the graphs indicate the median value for each mouse group. (**C**) The  
425 number of GS-II+/CD44v+ pixels per image was quantified. (**D**) TFF3 staining was semi-  
426 quantitatively scored in a blinded fashion. Non-specific staining was not included in the score  
427 (see **Figure S9**). (**G**) The percentage of Trop+ gland fragments was determined by collagen VI  
428 staining to detect individual gland fragments. (**H**) KI-67+/DAPI+ nuclei were enumerated and  
429 normalized to the DAPI content (total number of DAPI+ pixels) of each image. Statistically  
430 significant comparisons are indicated by: \*  $P < 0.05$ , \*\*  $P < 0.01$ , \*\*\*\*  $P < 0.0001$ , Kruskal-  
431 Wallis test with Dunn’s correction. Representative images are shown. Scale bars, 100  $\mu\text{m}$ .

432

## 433 Discussion

434

435 In this study we examined the effect of *Hp* infection in stomachs expressing active KRAS  
436 (**Table 1**). Up to 40% of human gastric cancers have genetic signatures of RAS activity<sup>24, 25</sup>.  
437 Activation of RAS and/or other oncogenic pathways in humans could be a consequence of *Hp*-  
438 driven inflammation. In our model, KRAS activation serves as a tool to model the consequences  
439 of oncogenic inflammation caused by *Hp* infection. Because active KRAS alone is sufficient to  
440 cause gastric preneoplastic progression<sup>21</sup>, it might be expected that *Hp* infection would have no  
441 impact on KRAS-driven phenotypes. However, we found that *Hp* infection did influence  
442 preneoplastic progression in this model. *Hp* infection in KRAS-expressing mice led to more  
443 severe inflammation, an altered trajectory of metaplasia, substantial cell proliferation, and  
444 increased dysplasia compared to active KRAS alone. Additionally, eradication of *Hp* with  
445 antibiotics prevented these tissue changes, in accordance with a major long-term study of *Hp*  
446 eradication in Colombian adults with precancerous lesions, which showed that continuous *Hp*  
447 presence was significantly associated with disease progression<sup>48</sup>. Thus, our study supports the  
448 hypothesis that sustained *Hp* can impact the molecular course of cancer development, beyond  
449 just initiating chronic inflammation.

450 Different mouse models exhibit different clinical features of preneoplastic progression:  
451 for example, *Helicobacter* infection alone causes SPEM, but does not cause foveolar hyperplasia



452 or IM in C57BL/6 mice, whereas uninfected *Mist1-Kras* mice exhibit all of these tissue states  
453 after active KRAS induction<sup>49</sup>. Here we found that the combination of sustained *Hp* infection  
454 and active KRAS expression has a unique impact on the development of gastric metaplasia that  
455 is not observed with either individual parameter. Compared to *Hp*<sup>-</sup>/KRAS<sup>+</sup> mice, *Hp*<sup>+</sup>/KRAS<sup>+</sup>  
456 mice had no difference in foveolar hyperplasia or expression of the IM marker MUC2, but had  
457 decreased expression of the IM marker TFF3 and increased expression of the SPEM marker  
458 CD44v. Further work is needed to determine whether these changes in metaplasia marker  
459 expression may reflect increased SPEM vs. a process similar to incomplete IM. To our  
460 knowledge, of the various mouse models of gastric corpus preneoplastic progression, only *Mist1*-  
461 *Kras* mice exhibit true IM (indicated by TFF3<sup>+</sup> and MUC2<sup>+</sup> glands) in 100% of mice; most  
462 other models exhibit SPEM with or without intestinalizing characteristics<sup>49</sup>. The finding that *Hp*  
463 infection altered TFF3 expression in *Mist1-Kras* mice is therefore quite striking. TFF3  
464 expression was moderate in both treatment groups at two weeks, and it is not yet known whether  
465 TFF3 expression may have peaked in *Hp*<sup>+</sup>/KRAS<sup>+</sup> mice at an intermediate time point, such as  
466 four weeks, or was never as strongly expressed as in *Hp*<sup>-</sup>/KRAS<sup>+</sup> mice. Notably, several human  
467 studies have reported that the association of SPEM with gastric adenocarcinoma is equal to or  
468 even greater than that of IM<sup>50-52</sup>, leading to questions in the field regarding the trajectory of  
469 metaplasia development prior to gastric cancer onset. Our findings suggest that the trajectory of  
470 metaplasia could differ depending on whether or not *Hp* remains present in the stomach  
471 throughout preneoplastic progression.

472 Sustained *Hp* infection also caused a striking increase in cell proliferation as indicated by  
473 KI-67 staining, and increased TROP2 staining at 12 weeks. TROP2 expression was lower in our  
474 mice than what was previously reported<sup>40</sup>, which may reflect differences in animal housing  
475 conditions, different methods of tissue fixation and processing, or components of the microbiome  
476 (although antibiotic perturbation in *Hp*<sup>-</sup>/KRAS<sup>+</sup> mice had no effect on expression of TROP2 or  
477 metaplasia markers). Nonetheless, within our controlled experiments, TROP2 staining was  
478 greatest in *Hp*<sup>+</sup>/KRAS<sup>+</sup> mice, suggesting that infection accelerates the onset of dysplasia. While  
479 almost all of the TROP2<sup>+</sup> glands in *Hp*<sup>+</sup>/KRAS<sup>+</sup> mice had co-localized KI-67 staining,  
480 demonstrating proliferation of dysplastic glands, there were also many KI-67<sup>+</sup> cells in TROP2-  
481 glands. Future studies will seek to elucidate the specific cell types that are proliferating in  
482 *Hp*<sup>+</sup>/KRAS<sup>+</sup> mice. Despite the enhanced proliferation of dysplastic glands, *Hp*<sup>+</sup>/KRAS<sup>+</sup> mice

483 did not develop gastric tumors within 12 weeks. One limitation of our study is that the *Mist1*  
484 promoter is expressed outside the stomach in secretory lineages, including the salivary glands.  
485 Approximately four months after active KRAS induction, *Mist1-Kras* mice require humane  
486 euthanasia due to salivary gland tumors. Thus, we cannot test whether *Hp* infection promotes  
487 even more severe phenotypes, such as tumor development, at later time points. Specifically  
488 targeting active KRAS to the chief cells via other promoters could overcome this hurdle.  
489 However, *Hp*<sup>+</sup>/*KRAS*<sup>+</sup> mice did have increased expression of genes known to be associated  
490 with gastrointestinal cancers. It may be that at least some of these genes are associated with  
491 gastric cancer simply because they reflect *Hp* infection, the biggest risk factor for gastric cancer  
492 development.

493 Interestingly, we found that a few *Hp*<sup>+</sup>/*KRAS*<sup>+</sup> mice naturally cleared their infection, yet  
494 still had a high degree of immunopathology. A limitation of modeling *Hp* infection in mice is the  
495 inability to monitor bacterial burdens over time. It may be that the mice in question cleared their  
496 infection just prior to euthanasia, with no time for *Hp*-driven tissue changes to reverse.  
497 Alternatively, *Hp* infection may lead to a “point of no return,” after which immunopathology  
498 develops even in the absence of *Hp*. This hypothesis has been used to explain the lack of  
499 detectable *Hp* in about half of human gastric tumors<sup>53,54</sup>. However, we found that antibiotic  
500 eradication of *Hp* after six weeks prevented the accelerated dysplasia and hyperproliferation  
501 phenotypes at 12 weeks. Thus, if a “point of no return” exists in this model, it must occur after  
502 six weeks.

503 We note that no significant differences in metaplasia or dysplasia marker expression were  
504 observed between *Hp*<sup>-</sup>/*KRAS*<sup>+</sup> mice and *Hp*<sup>+</sup>/*KRAS*<sup>+</sup> mice at two weeks, suggesting that the  
505 adaptive immune response to *Hp* infection may be what promotes the differences in metaplasia  
506 and dysplasia observed at later time points. This observation agrees with previous findings that T  
507 cells were necessary for *Helicobacter*-associated gastritis<sup>27,28</sup> and metaplasia development<sup>55</sup>.  
508 The immune response seen in *Hp*<sup>+</sup>/*KRAS*<sup>+</sup> mice at six and especially 12 weeks far exceeded  
509 what was observed in either *Hp*<sup>+</sup>/*KRAS*<sup>-</sup> or *Hp*<sup>-</sup>/*KRAS*<sup>+</sup> mice, and indeed is much greater than  
510 what is typically seen in *Hp* mouse models. Notably, this inflammation did not eradicate *Hp*:  
511 most *Hp*<sup>+</sup>/*KRAS*<sup>+</sup> mice remained colonized at 12 weeks. *Hp* cells were observed within the  
512 lumen of metaplastic glands, where they may be protected from direct immune cell interaction.  
513 Additionally, *Hp* has multiple strategies to prevent immune-mediated clearance<sup>13</sup>, including

514 disruption of normal T cell functions by: triggering upregulation of PD-L1, a T cell inhibitory  
515 ligand that binds programmed cell death protein-1 (PD-1), on gastric epithelial cells, leading to T  
516 cell exhaustion<sup>19</sup>; inducing anergy through promoting T cell expression of the CTLA-4 co-  
517 receptor<sup>56</sup>; inhibiting T cell proliferation and normal effector functions with the vacuolating  
518 cytotoxin VacA<sup>20</sup>; and the induction of tolerogenic dendritic cells, which promote the  
519 differentiation of naive T cells into immunosuppressive regulatory T cells<sup>13</sup>. It remains unknown  
520 whether and to what extent *Hp* may disrupt T cell functions in our model. *Hp*<sup>+</sup>/KRAS<sup>+</sup> mice  
521 were unique in their upregulation of *Foxp3* and had FOXP3<sup>+</sup> T cells at 12 weeks, but these cells  
522 were not sufficient to limit immunopathology. As well, in *Hp*<sup>+</sup>/KRAS<sup>+</sup> mice we observed strong  
523 transcriptional upregulation of T cell exhaustion-related genes, such as *Pdcd1* (PD-1), and *Ctla4*,  
524 implicated in T cell anergy. By immunohistochemistry we saw evidence of PD-1 expression in  
525 both *Hp*<sup>-</sup>/KRAS<sup>+</sup> and *Hp*<sup>+</sup>/KRAS<sup>+</sup> mice. Further studies are needed to characterize the exact  
526 nature of immune cell polarization differences between treatment groups; to confirm whether the  
527 T cells observed in *Hp*<sup>+</sup>/KRAS<sup>+</sup> mice may be exhausted, anergic or senescent; and to test  
528 whether immunosuppression or immunomodulation would be protective against *Hp*'s effects in  
529 the model. Nonetheless, it is clear that the combination of *Hp* infection and active KRAS  
530 expression leads to a potent and unique inflammatory state. Given that immunotherapy is still  
531 under-utilized in gastric cancer<sup>57</sup> and only a subset of patients benefit from such treatments<sup>58</sup>, a  
532 better understanding of how active *Hp* infection may alter the immune microenvironment during  
533 gastric metaplasia and cancer development is urgently needed and may lead to new therapeutic  
534 strategies.

535         When *Hp* was first discovered to be a bacterial carcinogen, studies using tissue histology  
536 rarely detected *Hp* within gastric tumors. Such studies may have helped establish the belief that  
537 although *Hp* initiates the gastric cancer cascade, by the time gastric cancer is developed, *Hp* no  
538 longer matters – the so-called “hit-and-run” model. However, more sensitive methods detect *Hp*  
539 in about half of gastric tumors<sup>9-11</sup>, indicating that a large percentage of patients maintain active  
540 *Hp* infection throughout cancer development. Notably, *Hp* eradication combined with  
541 endoscopic resection of early gastric cancer significantly prevents metachronous gastric cancer  
542<sup>12</sup>. As well, a recent study of 135 *Hp*-seropositive subjects with IM found that patients with  
543 active *Hp* infection (determined by histology and/or sequencing) were significantly more likely  
544 to have somatic copy number alterations (sCNA), and that patients with sCNA were more likely

545 to experience IM progression<sup>42</sup>. Given these observations, there is an urgent need for preclinical  
546 models that identify unique features of gastric neoplasia with vs. without concomitant *Hp*  
547 infection, both to understand the etiology of gastric cancer and to determine the impact of  
548 infection on different therapeutic approaches. We have shown here that *Hp* can significantly  
549 impact metaplasia and dysplasia development in a clinically relevant mouse model, which  
550 suggests that gastric preneoplastic progression can develop differently in the presence vs.  
551 absence of *Hp*. Future studies will elucidate the molecular mechanism(s) through which *Hp*  
552 exerts its effects in this model, and test whether active *Hp* infection during metaplasia or cancer  
553 may represent a therapeutic vulnerability that could be targeted with immunotherapy.

554

## 555 **Materials and Methods**

556

### 557 *Ethics Statement*

558 All mouse experiments were performed in accordance with the recommendations in the National  
559 Institutes of Health Guide for the Care and Use of Laboratory Animals and were approved by the  
560 Fred Hutch Institutional Animal Care and Use Committee, protocol number 1531.

561

### 562 *Helicobacter pylori Strains and Growth Conditions*

563 *Hp* strain PMSS1, which is also called 10700 and which is CagA<sup>+</sup> with an active type IV  
564 secretion system<sup>47, 59</sup>, and derivatives were cultured at 37°C with 10% CO<sub>2</sub> and 10% O<sub>2</sub> in a  
565 trigas incubator (MCO-19M, Sanyo). *Hp* titers were determined by quantitative culture on horse  
566 blood Columbia agar (BD Biosciences) with antibiotic supplementation to prevent overgrowth of  
567 commensal organisms<sup>60</sup>.

568

### 569 *Mist1-Kras Mouse Model*

570 Mist1-CreERT2 Tg/+; LSL-K-Ras (G12D) Tg/+ (“*Mist1-Kras*,” C57BL/6 background) mice  
571 were described previously<sup>21</sup>. Eight to 16 week-old male and female mice were infected with  
572 5x10<sup>7</sup> mid-log culture *Hp* cells in 100 μL of liquid media (BB10) containing 90% (v/v) Brucella  
573 broth (BD Biosciences) and 10% fetal bovine serum (Gibco), or mock-infected with 100 μL of  
574 BB10. To induce active (oncogenic) KRAS expression, mice received three subcutaneous doses  
575 of 5 mg of tamoxifen (Sigma) in corn oil (Sigma) over three days, or were sham-induced with

576 corn oil, starting one day after *Hp* or mock infection. We used n=10-16 mice per group in N=2  
577 independent experiments per time point, except for antibiotic eradication after six weeks, which  
578 used n=5-7 mice per group in N=1 experiment. Subsequent analyses of tissue changes used n=5-  
579 12 samples per treatment group, chosen randomly. Mice were humanely euthanized by CO<sub>2</sub>  
580 inhalation followed by cervical dislocation at two, six or 12 weeks after infection and transgene  
581 induction. Stomachs were aseptically harvested; a portion was used for *Hp* culture and the rest  
582 fixed in 10% neutral-buffered formalin for sectioning. For antibiotic eradication, mice received  
583 4.5 mg/mL metronidazole, 10 mg/mL tetracycline hydrochloride and 1.2 mg/mL bismuth  
584 subcitrate, or vehicle (water), by oral gavage for two weeks<sup>47</sup>.

585

### 586 *Histology*

587 A veterinary pathologist (A.K.) scored hematoxylin and eosin-stained tissue sections in a blinded  
588 fashion according to criteria adapted from Rogers<sup>26</sup>. The sum of the individual scores for each  
589 criterion were summed to generate a histological activity index (HAI) score.

590

### 591 *Gene Expression Analysis*

592 RNA was extracted from five 4- $\mu$ m formalin-fixed, paraffin-embedded (FFPE) stomach sections  
593 per mouse using the AllPrep DNA/RNA FFPE Kit (Qiagen) and gene expression was detected  
594 using the nCounter Mouse Immunology Panel (NanoString). Gene expression differences were  
595 detected using nSolver software (NanoString) (**Supplementary Table S2**). Hierarchical  
596 clustering was performed and heat maps were generated with HeatMapper<sup>61</sup> using the average  
597 linkage method with Euclidian distance, using log<sub>2</sub>-transformed gene expression data.

598

### 599 *Multiplex Immune Immunohistochemistry*

600 Tissues were stained using the Leica BOND RX system using Leica BOND reagents for  
601 dewaxing, antigen retrieval/antibody stripping, and rinsing after each step (**Supplementary**  
602 **Table S1**). To obtain multiplex labeling, one primary antibody was applied for 60 minutes,  
603 followed by the relevant secondary antibody and OPAL fluorophore for 10 minutes each. Slides  
604 were stripped of excess antibodies and the next primary and secondary were applied in sequence  
605 until all eight primary antibodies were applied.

606



607 *Immunofluorescence Microscopy and Quantitation of Staining*

608 Immunofluorescence microscopy to assess gastric preneoplastic progression was performed as  
609 previously described<sup>21</sup> (**Supplementary Table S3**). Three to five representative images of  
610 corpus tissue per mouse were used for quantitation and the median value was reported for each  
611 mouse. Scripts for quantitation of KI-67, GS-II, CD44v and TROP2 can be found on GitHub at:  
612 <https://github.com/salama-lab/stomach-image-quantitation>.

613

614 *Statistical Analyses*

615 For NanoString analysis,  $P_{\text{adjusted}}$  values were generated in nSolver with the Benjamini-Yekutieli  
616 procedure for controlling the false discovery rate. Other statistics were performed in GraphPad  
617 Prism v7.01. Comparisons of three or more groups were performed with the Kruskal-Wallis test  
618 with Dunn's multiple test correction.  $P < 0.05$  was considered statistically significant.

619

620 **Acknowledgement**

621 The authors wish to acknowledge Savanh Chanthaphavong and Louis Kao for assistance with  
622 experimental histopathology and Alicia M. Meyer for assistance with mouse experiments.

623

624 **Funding**

625 This work was funded by an Innovation Grant from the Pathogen-Associated Malignancies  
626 Integrated Research Center at Fred Hutchinson Cancer Research Center and NIH R01 AI54423  
627 (to NRS). Research was supported by the Cellular Imaging, Comparative Medicine, Genomics &  
628 Bioinformatics, and Research Pathology Shared Resources of the Fred Hutch/University of  
629 Washington Cancer Consortium (P30 CA015704). VPO is a Cancer Research Institute Irvington  
630 Fellow supported by the Cancer Research Institute, and was also supported by a Debbie's Dream  
631 Foundation—AACR Gastric Cancer Research Fellowship, in memory of Sally Mandel (18-40-  
632 41-OBRI). AER was supported by the Jacques Chiller Award from the University of Washington  
633 Department of Microbiology. JRG was supported by Department of Veterans Affairs Merit  
634 Review Award IBX000930, NIH R01 DK101332, DOD CA160479 and a Cancer UK Grand  
635 Challenge Award. EC was supported by the AACR (17-20-41-CHOI), the DOD CA160399 and  
636 pilot funding from Vanderbilt DDRC DK058404 and VICC GI SPORE P50CA236733.

637

638

639 **References**

640

- 641 1. de Martel C, Georges D, Bray F, et al. Global burden of cancer attributable to infections  
642 in 2018: a worldwide incidence analysis. *Lancet Glob Health* 2019.
- 643 2. Plummer M, Franceschi S, Vignat J, et al. Global burden of gastric cancer attributable to  
644 *Helicobacter pylori*. *Int J Cancer* 2015;136:487-90.
- 645 3. Suerbaum S, Michetti P. *Helicobacter pylori* infection. *N Engl J Med* 2002;347:1175-86.
- 646 4. Kuipers EJ. Review article: exploring the link between *Helicobacter pylori* and gastric  
647 cancer. *Aliment Pharmacol Ther* 1999;13 Suppl 1:3-11.
- 648 5. Kusters JG, van Vliet AH, Kuipers EJ. Pathogenesis of *Helicobacter pylori* infection.  
649 *Clin Microbiol Rev* 2006;19:449-90.
- 650 6. Allen LA, Beecher BR, Lynch JT, et al. *Helicobacter pylori* disrupts NADPH oxidase  
651 targeting in human neutrophils to induce extracellular superoxide release. *J Immunol*  
652 2005;174:3658-67.
- 653 7. Chaturvedi R, Asim M, Romero-Gallo J, et al. Spermine oxidase mediates the gastric  
654 cancer risk associated with *Helicobacter pylori* CagA. *Gastroenterology* 2011;141:1696-  
655 708 e1-2.
- 656 8. Chaturvedi R, Cheng Y, Asim M, et al. Induction of polyamine oxidase 1 by *Helicobacter*  
657 *pylori* causes macrophage apoptosis by hydrogen peroxide release and mitochondrial  
658 membrane depolarization. *J Biol Chem* 2004;279:40161-73.
- 659 9. Cristescu R, Lee J, Nebozhyn M, et al. Molecular analysis of gastric cancer identifies  
660 subtypes associated with distinct clinical outcomes. *Nat Med* 2015;21:449-56.
- 661 10. Tang YL, Gan RL, Dong BH, et al. Detection and location of *Helicobacter pylori* in  
662 human gastric carcinomas. *World J Gastroenterol* 2005;11:1387-91.
- 663 11. Talarico S, Leverich CK, Wei B, et al. Increased *H. pylori* stool shedding and EPIYA-D  
664 *cagA* alleles are associated with gastric cancer in an East Asian hospital. *PLoS One*  
665 2018;13:e0202925.
- 666 12. Choi IJ, Kook MC, Kim YI, et al. *Helicobacter pylori* Therapy for the Prevention of  
667 Metachronous Gastric Cancer. *N Engl J Med* 2018;378:1085-1095.
- 668 13. Salama NR, Hartung ML, Muller A. Life in the human stomach: persistence strategies of  
669 the bacterial pathogen *Helicobacter pylori*. *Nat Rev Microbiol* 2013;11:385-99.
- 670 14. Velin D, Favre L, Bernasconi E, et al. Interleukin-17 is a critical mediator of vaccine-  
671 induced reduction of *Helicobacter* infection in the mouse model. *Gastroenterology*  
672 2009;136:2237-2246 e1.
- 673 15. Akhiani AA, Pappo J, Kabok Z, et al. Protection against *Helicobacter pylori* infection  
674 following immunization is IL-12-dependent and mediated by Th1 cells. *J Immunol*  
675 2002;169:6977-84.
- 676 16. Sayi A, Kohler E, Hitzler I, et al. The CD4+ T cell-mediated IFN-gamma response to  
677 *Helicobacter* infection is essential for clearance and determines gastric cancer risk. *J*  
678 *Immunol* 2009;182:7085-101.
- 679 17. Shi Y, Liu XF, Zhuang Y, et al. *Helicobacter pylori*-induced Th17 responses modulate  
680 Th1 cell responses, benefit bacterial growth, and contribute to pathology in mice. *J*  
681 *Immunol* 2010;184:5121-9.
- 682 18. Stoicov C, Fan X, Liu JH, et al. T-bet knockout prevents *Helicobacter felis*-induced  
683 gastric cancer. *J Immunol* 2009;183:642-9.

- 684 19. Das S, Suarez G, Beswick EJ, et al. Expression of B7-H1 on gastric epithelial cells: its  
685 potential role in regulating T cells during *Helicobacter pylori* infection. *J Immunol*  
686 2006;176:3000-9.
- 687 20. Gebert B, Fischer W, Weiss E, et al. *Helicobacter pylori* vacuolating cytotoxin inhibits T  
688 lymphocyte activation. *Science* 2003;301:1099-102.
- 689 21. Choi E, Hendley AM, Bailey JM, et al. Expression of Activated Ras in Gastric Chief  
690 Cells of Mice Leads to the Full Spectrum of Metaplastic Lineage Transitions.  
691 *Gastroenterology* 2016;150:918-30 e13.
- 692 22. Campbell SL, Khosravi-Far R, Rossman KL, et al. Increasing complexity of Ras  
693 signaling. *Oncogene* 1998;17:1395-413.
- 694 23. Jackson EL, Willis N, Mercer K, et al. Analysis of lung tumor initiation and progression  
695 using conditional expression of oncogenic K-ras. *Genes Dev* 2001;15:3243-8.
- 696 24. Deng N, Goh LK, Wang H, et al. A comprehensive survey of genomic alterations in  
697 gastric cancer reveals systematic patterns of molecular exclusivity and co-occurrence  
698 among distinct therapeutic targets. *Gut* 2012;61:673-84.
- 699 25. Cancer Genome Atlas Research N. Comprehensive molecular characterization of gastric  
700 adenocarcinoma. *Nature* 2014;513:202-9.
- 701 26. Rogers AB. Histologic scoring of gastritis and gastric cancer in mouse models. *Methods*  
702 *Mol Biol* 2012;921:189-203.
- 703 27. Ernst PB, Crowe SE, Reyes VE. How does *Helicobacter pylori* cause mucosal damage?  
704 The inflammatory response. *Gastroenterology* 1997;113:S35-42; discussion S50.
- 705 28. Eaton KA, Mefford M, Thevenot T. The role of T cell subsets and cytokines in the  
706 pathogenesis of *Helicobacter pylori* gastritis in mice. *J Immunol* 2001;166:7456-61.
- 707 29. Saeidi A, Zandi K, Cheok YY, et al. T-Cell Exhaustion in Chronic Infections: Reversing  
708 the State of Exhaustion and Reinvigorating Optimal Protective Immune Responses. *Front*  
709 *Immunol* 2018;9:2569.
- 710 30. Blackburn SD, Shin H, Haining WN, et al. Coregulation of CD8+ T cell exhaustion by  
711 multiple inhibitory receptors during chronic viral infection. *Nat Immunol* 2009;10:29-37.
- 712 31. Barrozo RM, Cooke CL, Hansen LM, et al. Functional plasticity in the type IV secretion  
713 system of *Helicobacter pylori*. *PLoS Pathog* 2013;9:e1003189.
- 714 32. Lowther DE, Goods BA, Lucca LE, et al. PD-1 marks dysfunctional regulatory T cells in  
715 malignant gliomas. *JCI Insight* 2016;1.
- 716 33. McGarry MP, Stewart CC. Murine eosinophil granulocytes bind the murine macrophage-  
717 monocyte specific monoclonal antibody F4/80. *J Leukoc Biol* 1991;50:471-8.
- 718 34. Petersen CP, Weis VG, Nam KT, et al. Macrophages promote progression of spasmolytic  
719 polypeptide-expressing metaplasia after acute loss of parietal cells. *Gastroenterology*  
720 2014;146:1727-38 e8.
- 721 35. Radyk MD, Burclaff J, Willet SG, et al. Metaplastic Cells in the Stomach Arise,  
722 Independently of Stem Cells, via Dedifferentiation or Transdifferentiation of Chief Cells.  
723 *Gastroenterology* 2018;154:839-843 e2.
- 724 36. Merchant JL. Inflammation, atrophy, gastric cancer: connecting the molecular dots.  
725 *Gastroenterology* 2005;129:1079-82.
- 726 37. Erkan G, Gonul, II, Kandilci U, et al. Evaluation of apoptosis along with BCL-2 and KI-  
727 67 expression in patients with intestinal metaplasia. *Pathol Res Pract* 2012;208:89-93.
- 728 38. Shvartsur A, Bonavida B. Trop2 and its overexpression in cancers: regulation and  
729 clinical/therapeutic implications. *Genes Cancer* 2015;6:84-105.

- 730 39. Muhlmann G, Spizzo G, Gostner J, et al. TROP2 expression as prognostic marker for  
731 gastric carcinoma. *J Clin Pathol* 2009;62:152-8.
- 732 40. Riera KM, Jang B, Min J, et al. Trop2 is upregulated in the transition to dysplasia in the  
733 metaplastic gastric mucosa. *J Pathol* 2020.
- 734 41. Min J, Vega PN, Engevik AC, et al. Heterogeneity and dynamics of active Kras-induced  
735 dysplastic lineages from mouse corpus stomach. *Nat Commun* 2019;10:5549.
- 736 42. Huang KK, Ramnarayanan K, Zhu F, et al. Genomic and Epigenomic Profiling of High-  
737 Risk Intestinal Metaplasia Reveals Molecular Determinants of Progression to Gastric  
738 Cancer. *Cancer Cell* 2018;33:137-150 e5.
- 739 43. Jin Z, Jiang W, Wang L. Biomarkers for gastric cancer: Progression in early diagnosis  
740 and prognosis (Review). *Oncol Lett* 2015;9:1502-1508.
- 741 44. Molina-Castro SE, Tiffon C, Giraud J, et al. The Hippo Kinase LATS2 Controls  
742 Helicobacter pylori-Induced Epithelial-Mesenchymal Transition and Intestinal  
743 Metaplasia in Gastric Mucosa. *Cell Mol Gastroenterol Hepatol* 2020;9:257-276.
- 744 45. Lee J, Goh SH, Song N, et al. Overexpression of IFITM1 has clinicopathologic effects on  
745 gastric cancer and is regulated by an epigenetic mechanism. *Am J Pathol* 2012;181:43-  
746 52.
- 747 46. Alpizar-Alpizar W, Christensen IJ, Santoni-Rugiu E, et al. Urokinase plasminogen  
748 activator receptor on invasive cancer cells: a prognostic factor in distal gastric  
749 adenocarcinoma. *Int J Cancer* 2012;131:E329-36.
- 750 47. Arnold IC, Lee JY, Amieva MR, et al. Tolerance rather than immunity protects from  
751 Helicobacter pylori-induced gastric preneoplasia. *Gastroenterology* 2011;140:199-209.
- 752 48. Mera RM, Bravo LE, Camargo MC, et al. Dynamics of Helicobacter pylori infection as a  
753 determinant of progression of gastric precancerous lesions: 16-year follow-up of an  
754 eradication trial. *Gut* 2018;67:1239-1246.
- 755 49. Petersen CP, Mills JC, Goldenring JR. Murine Models of Gastric Corpus Preneoplasia.  
756 *Cell Mol Gastroenterol Hepatol* 2017;3:11-26.
- 757 50. Schmidt PH, Lee JR, Joshi V, et al. Identification of a metaplastic cell lineage associated  
758 with human gastric adenocarcinoma. *Lab Invest* 1999;79:639-46.
- 759 51. Yamaguchi H, Goldenring JR, Kaminishi M, et al. Identification of spasmolytic  
760 polypeptide expressing metaplasia (SPEM) in remnant gastric cancer and surveillance  
761 postgastrectomy biopsies. *Dig Dis Sci* 2002;47:573-8.
- 762 52. Halldorsdottir AM, Sigurdardottrir M, Jonasson JG, et al. Spasmolytic polypeptide-  
763 expressing metaplasia (SPEM) associated with gastric cancer in Iceland. *Dig Dis Sci*  
764 2003;48:431-41.
- 765 53. Peleteiro B, La Vecchia C, Lunet N. The role of Helicobacter pylori infection in the web  
766 of gastric cancer causation. *Eur J Cancer Prev* 2012;21:118-25.
- 767 54. Atherton JC, Blaser MJ. Coadaptation of Helicobacter pylori and humans: ancient  
768 history, modern implications. *J Clin Invest* 2009;119:2475-87.
- 769 55. Roth KA, Kapadia SB, Martin SM, et al. Cellular immune responses are essential for the  
770 development of Helicobacter felis-associated gastric pathology. *J Immunol*  
771 1999;163:1490-7.
- 772 56. Anderson KM, Czinn SJ, Redline RW, et al. Induction of CTLA-4-mediated anergy  
773 contributes to persistent colonization in the murine model of gastric Helicobacter pylori  
774 infection. *J Immunol* 2006;176:5306-13.

- 775 57. Zayac A, Almhanna K. Esophageal, gastric cancer and immunotherapy: small steps in the  
776 right direction? *Transl Gastroenterol Hepatol* 2020;5:9.
- 777 58. Figueroa-Protti L, Soto-Molinari R, Calderon-Osorno M, et al. Gastric Cancer in the Era  
778 of Immune Checkpoint Blockade. *J Oncol* 2019;2019:1079710.
- 779 59. Lee A, O'Rourke J, De Ungria MC, et al. A standardized mouse model of *Helicobacter*  
780 *pylori* infection: introducing the Sydney strain. *Gastroenterology* 1997;112:1386-97.
- 781 60. Martinez LE, O'Brien VP, Leverich CK, et al. Nonhelical *Helicobacter pylori* Mutants  
782 Show Altered Gland Colonization and Elicit Less Gastric Pathology than Helical Bacteria  
783 during Chronic Infection. *Infect Immun* 2019;87.
- 784 61. Babicki S, Arndt D, Marcu A, et al. Heatmapper: web-enabled heat mapping for all.  
785 *Nucleic Acids Res* 2016;44:W147-53.
- 786 62. Ishigami S, Natsugoe S, Tokuda K, et al. Tumor-associated macrophage (TAM)  
787 infiltration in gastric cancer. *Anticancer Res* 2003;23:4079-83.  
788

| Parameter                              | Hp-/KRAS+                                                                                                                                    | Hp+/KRAS+                                                                                                                          | Relevance to Humans                                                                                                                                                                                                                                           |
|----------------------------------------|----------------------------------------------------------------------------------------------------------------------------------------------|------------------------------------------------------------------------------------------------------------------------------------|---------------------------------------------------------------------------------------------------------------------------------------------------------------------------------------------------------------------------------------------------------------|
| Tissue histology                       | Inflammation, loss of parietal cells, surface epithelial cell hyperplasia, tortuous glands. Median HAI is 13 at six weeks and 11 at 12 weeks | Worsening of these parameters. Median HAI is 19 at six weeks and 20.5 at 12 weeks                                                  | Inflammation, parietal cell loss and metaplasia are hallmarks of gastric preneoplastic progression <sup>4, 5</sup>                                                                                                                                            |
| Immune gene expression                 | Less upregulation of T cell and macrophage-related genes                                                                                     | Upregulation of genes related to T cells and T cell exhaustion, macrophages and gastric cancer; unique inflammatory gene signature | Many genes upregulated in <i>Hp</i> +/ <i>KRAS</i> + mice were shown to be upregulated in human gastrointestinal cancers <sup>41-46</sup>                                                                                                                     |
| T cells                                | Moderate T cells, predominantly CD4+. T cells mostly restricted to the base of the glands                                                    | Many T cells, predominantly CD4+, including FOXP3+. T cells extend throughout the glands                                           | <i>Hp</i> infection leads to recruitment and activation of T cells <sup>14-16</sup> , which may lead to mucosal damage and accumulation of mutations <sup>17, 18</sup><br><br>Exhausted T cells may be targeted by immune checkpoint inhibitors <sup>58</sup> |
| Macrophages                            | F4/80+/CD163+ (M2) cells are present, with a few F4/80+/MHC class II+ (M1) as well                                                           | Some F4/80+/MHC class II+ (M1) cells are present, with very few F4/80+/CD163+ (M2)                                                 | M2 macrophages are found in human SPEM and IM <sup>34</sup><br><br>Macrophages can infiltrate into gastric tumors and are associated with worse surgical outcomes <sup>62</sup>                                                                               |
| Metaplasia marker expression (6 weeks) | Moderate CD44v9, high TFF3, low MUC2                                                                                                         | High CD44v9, moderate TFF3, low MUC2                                                                                               | SPEM (CD44v10+) and IM (MUC2+, TFF3+) are both precursor lesions associated                                                                                                                                                                                   |



|                                         |                                                                            |                                                                                                                                                  |                                                                                                                                                                                                          |
|-----------------------------------------|----------------------------------------------------------------------------|--------------------------------------------------------------------------------------------------------------------------------------------------|----------------------------------------------------------------------------------------------------------------------------------------------------------------------------------------------------------|
| Metaplasia marker expression (12 weeks) | Moderate CD44v9, high TFF3, low MUC2                                       | High CD44v9, low TFF3, low MUC2                                                                                                                  | with human gastric adenocarcinoma <sup>50-52</sup>                                                                                                                                                       |
| Cell proliferation                      | Moderate numbers of KI-67+ cells near the base of the glands               | Far more of KI-67+ cells, near the base and throughout the glands                                                                                | Cell proliferation was greater in IM than in gastritis or healthy human stomachs <sup>37</sup>                                                                                                           |
| Dysplasia                               | Low TROP2 expression; most TROP2+ glands are proliferative (KI-67+)        | Moderate TROP2 expression at 12 weeks and almost all TROP2+ glands are proliferative (KI-67+)                                                    | TROP2 overexpression is associated with many cancers <sup>38,39</sup> and was recently shown to be a gastric dysplasia marker in humans <sup>40</sup>                                                    |
| Antibiotic therapy                      | No impact on metaplasia, dysplasia or cell proliferation marker expression | <i>Hp</i> eradication prevents altered metaplasia, accelerated dysplasia and cell proliferation phenotypes; resembles <i>Hp</i> -/ <i>KRAS</i> + | <i>Hp</i> eradication prevented disease progression in patients with precancerous lesions <sup>48</sup><br><br>In cancer patients with <i>Hp</i> , eradication reduces metachronous cancer <sup>12</sup> |

789  
790  
791

**Table 1. Summary of differences between *Hp*-/*KRAS* and *Hp*+/*KRAS* mice. HAI, histological activity index.**

|     |                                |
|-----|--------------------------------|
| 792 | <b>Supplementary Material</b>  |
| 793 | Expanded Materials and Methods |
| 794 | Supplementary Figures 1-7      |
| 795 | Supplementary Tables 1 and 3   |
| 796 | Supplemental References        |
| 797 |                                |



## 798 **Expanded Materials and Methods**

799

### 800 *Ethics Statement*

801

802 All mouse experiments were performed in accordance with the recommendations in the National  
803 Institutes of Health Guide for the Care and Use of Laboratory Animals. The Fred Hutchinson  
804 Cancer Research Center is fully accredited by the Association for Assessment and Accreditation  
805 of Laboratory Animal Care and complies with the United States Department of Agriculture,  
806 Public Health Service, Washington State, and local area animal welfare regulations. Experiments  
807 were approved by the Fred Hutch Institutional Animal Care and Use Committee, protocol  
808 number 1531.

809

### 810 *Helicobacter pylori Strains and Growth Conditions*

811

812 *Helicobacter pylori* strain PMSS1, which is also called 10700 and which is CagA<sup>+</sup> with an  
813 active type IV secretion system <sup>1, 2</sup>, and derivatives were cultured at 37°C with 10% CO<sub>2</sub> and  
814 10% O<sub>2</sub> in a trigas incubator (MCO-19M, Sanyo). Cells were grown on solid media containing  
815 4% Columbia agar (BD Biosciences), 5% defibrinated horse blood (HemoStat Laboratories)  
816 0.2% β-cyclodextrin (Acros Organics), 10 μg/ml vancomycin (Sigma), 5 μg/ml cefsulodin  
817 (Sigma), 2.5 U/mL polymyxin B (Sigma), 5 μg/ml trimethoprim (Sigma) and 8 μg/ml  
818 amphotericin B (Sigma). For mouse infections, bacteria grown on horse blood plates were used  
819 to inoculate liquid media (BB10) containing 90% (v/v) Brucella broth (BD Biosciences) and  
820 10% fetal bovine serum (Gibco), which was cultured shaking at 200 rpm overnight and grown to  
821 an optical density at 600 nm of 0.4 - 0.6 (mid-log phase), from which an inoculum of  
822 approximately 5x10<sup>7</sup> *Hp* cells per 100 μl BB10 was prepared. To determine *Hp* titers in the  
823 stomach, harvested tissues were weighed, serially diluted, and plated on the solid media  
824 described above, with the addition of bacitracin (200 μg/ml, Acros Organics) to prevent growth  
825 of the stomach microbiota.

826

### 827 *Mist1-Kras Mouse Model*

828

829 A breeding pair of *Mist1-CreERT2 Tg/+; LSL-K-Ras (G12D) Tg/+* (“*Mist1-Kras*”) mice on the  
830 C57BL/6 background, described previously<sup>3</sup>, was obtained from Vanderbilt University (E.C.  
831 and J.R.G) and used to establish a colony at Fred Hutchinson Cancer Research Center. Mice  
832 were housed two to five per cage, with cages docked in HEPA-filtered ventilation racks that  
833 provide airflow control on a 12 hour light/dark cycle, and had access to chow (LabDiet) and  
834 water ad libitum. At weaning, ear punches were collected and used for genotyping as previously  
835 described<sup>3</sup> with the following primers: *Mist1* WT F: CCAAGATCGAGACCCTCACG; *Mist1*  
836 WT R: ACACACACAGCCCTTAGCTC *Mist1* Cre F: ACCGTCAGTACGTGAGATATCTT;  
837 *Mist1* Cre R: CCTGAAGATGTTTCGCGATTATCT; active KRAS F:  
838 TCTCTGCAGTTGTTGGCTCCAAC; active KRAS R:  
839 GCCTGAAGAACGAGATCAGCAGCC. Healthy eight to 16 week-old male and female mice  
840 (randomly allocated to treatment groups) were infected with  $5 \times 10^7$  mid-log culture *Hp* cells in  
841 100  $\mu$ L of BB10, or mock-infected with 100  $\mu$ L of BB10, via oral gavage. To induce active  
842 (oncogenic) KRAS expression, mice received three subcutaneous doses of 5 mg of tamoxifen  
843 (Sigma) in corn oil (Sigma) over three days, or were sham-induced with corn oil, starting one  
844 day after *Hp* or mock infection. For antibiotic eradication, mice received “triple therapy” of 4.5  
845 mg/mL metronidazole, 10 mg/mL tetracycline hydrochloride and 1.2 mg/mL bismuth subcitrate,  
846 or vehicle (water), by oral gavage.<sup>1</sup> Mice received six doses in seven days, two weeks in a row.  
847 Mice were humanely euthanized by CO<sub>2</sub> inhalation followed by cervical dislocation two, six or  
848 12 weeks after infection and transgene induction. Stomachs were aseptically harvested and most  
849 of the forestomach (non-glandular region) was discarded, leaving only the squamocolumnar  
850 junction between the forestomach and glandular epithelium. Approximately one-third of the  
851 stomach was homogenized and plated to enumerate *Hp*. The remaining approximately two-thirds  
852 of the stomach was fixed in 10% neutral-buffered formalin phosphate (Fisher), then embedded in  
853 paraffin and cut into 4  $\mu$ m sections on positively-charged slides. *Hp*<sup>+</sup>/KRAS<sup>+</sup> and *Hp*<sup>-</sup>/KRAS  
854 mice did not exhibit overall health differences; body weights and behaviors were similar at time  
855 of euthanasia.

856

857 *Histology*

858

859 Stomach sections were stained with hematoxylin and eosin (H&E). A veterinary pathologist  
860 (A.K.) scored the slides in a blinded fashion according to criteria adapted from Rogers <sup>4</sup>. Corpus  
861 tissue was evaluated for inflammation, epithelial defects, oxyntic atrophy, hyperplasia (tissue  
862 thickness), hyalinosis, pseudopyloric metaplasia, mucous metaplasia and dysplasia. The sum of  
863 the individual scores for each criterion were summed to generate a histological activity index  
864 (HAI) score. Scoring criteria are described below. HAI was not correlated with sex or with age  
865 of mice at sacrifice.

866

867 Inflammation: Multifocal aggregates of inflammatory cells merit a score of 1. As the aggregates  
868 coalesce across multiple high-power fields (40X objective), the score increases to 2. Sheets of  
869 inflammatory cells and/or lymphoid follicles in the mucosa or submucosa receive a score of 3.  
870 Florid inflammation that extends morally or transmurally is a score of 4. Epithelial defects: A  
871 tattered epithelium with occasional dilated glands is a score of 1. As the epithelium becomes  
872 attenuated and ectatic glands become more numerous, the score increases to 2. Inapparent  
873 epithelial lining of the surface with few recognizable gastric pits are given a score of 3. Score 4  
874 is reserved for mucosal erosions. Oxyntic atrophy: The oxyntic mucosa is defined by the  
875 presence of chief and parietal cells. Loss of up to half of the chief cells merit a score of 1. In  
876 instances with near complete loss of chief cells and minimal loss of parietal cells, a score 2 is  
877 assigned. The absence of chief cells with half the expected number of parietal cells is given a  
878 score of 3. Score 4 signifies near total loss of both chief and parietal cells. Surface epithelial  
879 hyperplasia: This score indicates elongation of the gastric gland due to increased numbers of  
880 surface (foveolar) and/or antral-type epithelial cells. Relative to the expected length of a normal  
881 gastric pit, a score of 1 indicates a 50% increase in length. A score of 2 is twice the expected  
882 length, a score of 3 is three times the expected length, and a score of 4 is four times the expected  
883 length. Hyalinosis: This mouse-specific gastritis lesion refers to the presence of brightly  
884 eosinophilic round or crystalline structures in the murine gastric surface epithelium. The  
885 presence of epithelial hyalinosis is given a score of 1 while absence of hyalinosis is a score 0.  
886 Pseudopyloric metaplasia: Pseudopyloric metaplasia is the loss of oxyntic mucosa and  
887 replacement with glands of a more antral phenotype. The score indicates the amount of  
888 replacement by antralized glands. Less than 25% replacement is a score of 1, 26-50%  
889 replacement is a score of 2, 51-75% replacement is a score of 3, and greater than 75%

890 replacement is a score of 4. Mucous metaplasia: This mouse-specific gastritis lesion is defined as  
891 the replacement of oxyntic cells with mucous producing cells that resemble Brunner's glands of  
892 the duodenum. The score is assigned based on the percentage of mucosa affected. A score 1  
893 indicates less than 25% involvement, a score of 2 indicates 26-50% involvement, a score of 3 is  
894 51-75% involvement, and a score of 4 means that greater than 75% of the mucosa is involved.  
895 Dysplasia: Dysplasia indicates a cellular abnormality of differentiation. In score 1 lesions, the  
896 glands are elongated with altered shapes, back-to-back forms, and asymmetrical cellular piling.  
897 In score 2, the dysplastic glands may coalesce with glandular ectasia, branching, infolding, and  
898 piling of cells. Gastric intraepithelial neoplasia (GIN) is given a score of 3 and invasive  
899 carcinoma is a score of 4. The dysplasia score describes the most severe lesion(s) in each mouse.

900

#### 901 *Gene Expression Analysis*

902

903 RNA was extracted from five 4- $\mu$ m FFPE stomach sections per mouse using the AllPrep  
904 DNA/RNA FFPE Kit (Qiagen) and gene expression was detected using the nCounter Mouse  
905 Immunology Panel (NanoString). Gene expression differences were detected using nSolver  
906 software (NanoString) and are given in **Supplementary Table 2**. Volcano plots were  
907 constructed by taking the  $\log_2$  of the fold change and the  $-\log_{10}$  of the unadjusted  $P$  value for each  
908 gene. The  $P_{\text{adjusted}}$  lines show genes meeting the threshold for significance after correction with  
909 the Benjamini-Yekutieli procedure for controlling the false discovery rate. Hierarchical  
910 clustering was performed and heat maps were generated through HeatMapper<sup>5</sup> using the average  
911 linkage method with Euclidian distance, with  $\log_2$ -transformed gene expression data. Clustering  
912 was applied to rows (genes) and columns (mice). To identify the unique gene signature in  
913  $Hp^+/KRAS^+$  mice, gene expression values were normalized to the geometric mean of the  
914 expression in  $Hp^-/KRAS^-$  mice, and all genes were identified for which the geometric mean of  
915 the fold change in  $Hp^+/KRAS^+$  mice was  $>2$  and in  $Hp^+/KRAS^-$  and  $Hp^-/KRAS^+$  mice was  
916  $<1.5$ , or the geometric mean of the fold change in  $Hp^+/KRAS^+$  mice was  $<0.5$  and in  
917  $Hp^+/KRAS^-$  and  $Hp^-/KRAS^+$  mice was  $>0.667$ .

918

#### 919 *Multiplex Immunohistochemistry for Immune Cell Detection*

920

921 Slides were baked for 60 minutes at 60°C and then dewaxed and stained on a Leica BOND RX  
922 system (Leica, Buffalo Grove, IL) using Leica BOND reagents for dewaxing (Dewax Solution),  
923 antigen retrieval/antibody stripping (Epitope Retrieval Solution 2), and rinsing (Bond Wash  
924 Solution). Antigen retrieval and antibody stripping steps were performed at 100°C with all other  
925 steps at ambient temperature. Endogenous peroxidase was blocked with 3% H<sub>2</sub>O<sub>2</sub> for 5 minutes  
926 followed by protein blocking with 10% normal mouse immune serum diluted in TCT buffer  
927 (0.05M Tris, 0.15M NaCl, 0.25% Casein, 0.1% Tween 20, 0.05% ProClin300 pH 7.6) for 10  
928 minutes. Primary and secondary antibodies are given in **Supplementary Table 1**. The first  
929 primary antibody (position 1) was applied for 60 minutes followed by the secondary antibody  
930 application for 10 minutes and the application of the tertiary TSA-amplification reagent  
931 (PerkinElmer OPAL fluor) for 10 minutes. A high stringency wash was performed after the  
932 secondary and tertiary applications using high-salt TBST solution (0.05M Tris, 0.3M NaCl, and  
933 0.1% Tween-20, pH 7.2-7.6). Undiluted, species-specific Polymer HRP was used for all  
934 secondary applications, either Leica's PowerVision Poly-HRP anti-Rabbit Detection or  
935 ImmPress Goat anti-Rat IgG Polymer Detection Kit (Vector Labs) as indicated in Table S1. The  
936 primary and secondary antibodies were stripped with retrieval solution for 20 minutes before  
937 repeating the process with the second primary antibody (position 2) starting with a new  
938 application of 3% H<sub>2</sub>O<sub>2</sub>. The process was repeated until seven positions were completed. For the  
939 eighth position, following the secondary antibody application, Opal TSA-DIG was applied for 10  
940 minutes, followed by the 20 minute stripping step in retrieval solution and application of Opal  
941 780 fluor for 10 minutes with high stringency washes performed after the secondary, TSA DIG,  
942 and Opal 780 fluor applications. The stripping step was not performed after the final position.  
943 Slides were removed from the stainer and stained with DAPI for 5 minutes, rinsed for 5 minutes,  
944 and coverslipped with Prolong Gold Antifade reagent (Invitrogen/Life Technologies). Slides  
945 were cured overnight at room temperature, then whole slide images were acquired on the Vectra  
946 Polaris Quantitative Pathology Imaging System (Akoya Biosciences). The entire tissue was  
947 selected for imaging using Phenochart and multispectral image tiles were acquired using the  
948 Polaris. Images were spectrally unmixed using Phenoptics inForm software and exported as  
949 multi-image TIF files, which were analyzed with HALO image analysis software (Indica Labs).  
950 DAPI was used to detect individual cells and then cells expressing each marker were

951 automatically detected based on signal intensity, and reported as a percentage of DAPI-positive  
952 cells.

953

### 954 *Immunofluorescence Microscopy of Epithelial Phenotypes*

955

956 Stomach sections were prepared as described above. To validate the antibodies used to detect  
957 intestinal metaplasia, the entire intestinal tract from duodenum to colon was removed from an  
958 untreated C57BL/6 mouse. The cecum was discarded and the unflushed intestinal tract was  
959 rolled as a “Swiss roll,” fixed in 10% neutral-buffered formalin, paraffin-embedded and  
960 sectioned. Tissue sections were deparaffinized with Histo-Clear solution (National Diagnostics)  
961 and rehydrated in decreasing concentrations of ethanol. Antigen retrieval was performed by  
962 boiling slides in 10 mM sodium citrate (Fisher) or Target Retrieval Solution (Agilent Dako) in a  
963 pressure cooker for 15 minutes. Slides were incubated with Protein Block, Serum-Free (Agilent  
964 Dako) for 90 minutes at room temperature. Primary antibodies (**Supplementary Table 3**) were  
965 diluted in Protein Block, Serum Free, or Antibody Diluent, Background Reducing (Agilent  
966 Dako), and applied to the slides overnight at 4°C. Secondary antibodies were diluted 1:500 in  
967 Protein Block, Serum Free and slides were incubated for one hour at room temperature protected  
968 from light. Slides were mounted in ProLong Gold antifade reagent with DAPI (Invitrogen) and  
969 allowed to cure for 24 hours at room temperature before imaging. Slides were imaged on a Zeiss  
970 LSM 780 laser-scanning confocal microscope using Zen software (Zeiss) and three to five  
971 representative images of the corpus were taken.

972

### 973 *Quantitation of Staining*

974

975 Three to five representative images of corpus tissue per mouse used for staining analysis and the  
976 median value was reported for each mouse. Investigators were blinded to the treatment groups.  
977 KI-67, GS-II, CD44v10 (orthologous to human CD44v9 and referred to herein as “CD44v”) and  
978 TROP2 markers were quantified from fluorescently immunolabelled tissue sections by custom-  
979 made scripts developed in MATLAB 2019a. Scripts can be found on Github at  
980 <https://github.com/salama-lab/stomach-image-quantitation>.

981



982 After background subtraction and denoising in each channel, positive pixels for DAPI, GS-II,  
983 CD44v or TROP2 were identified by image binarization using the Otsu method and  
984 morphological filtering. When appropriate, individual glands were segmented using the  
985 cytokeratin signal, which is predominant in glandular structures, or using the complement image  
986 of the collagen VI signal, which is excluded from glandular structures. For GS-II quantification,  
987 the fractional area of cytokeratin staining positive for GS-II was recorded. For TROP2  
988 quantification, the fractional area of each gland fragment identified by collagen VI labelling was  
989 recorded, and gland fragments with  $\geq 10\%$  TROP2-positive pixels were considered TROP2-  
990 positive. To identify GS-II and CD44v double-positive regions, the GS-II binary mask was first  
991 dilated by a few pixels, since GS-II is cytoplasmic and CD44v is membrane-bound. The resulting  
992 number of overlapping pixels per image was then recorded. To assess KI-67 staining, individual  
993 KI-67-positive nuclei were identified using a watershed algorithm after distance transformation  
994 of the binarized signal, and then normalized by dividing by the total number of DAPI-positive  
995 pixels in the image.

996  
997 TFF3, MUC2, and dual-positive TROP2/KI-67 staining were manually assessed. To assess TFF3  
998 staining, images were scored manually using a semi-quantitative scale with the following  
999 criteria: 0 = no staining, 1 = 1-25% of glands are positive, 2 = 26-50% of glands are positive, 3 =  
1000 51-75% of glands are positive, 4 = >75% of glands are positive for TFF3. Positive TFF3 signal  
1001 manifests as moderately bright, cell-associated staining with goblet cell-like morphology. Overly  
1002 bright staining without distinct goblet-like morphology, and/or staining within the gland lumen  
1003 (not cell-associated), was observed near the top of the glands in *Hp*-/KRAS- (healthy control)  
1004 mice and was considered false-positive staining. To assess MUC2 staining, glands were detected  
1005 by cytokeratin staining, and MUC2+ and MUC2- glands were manually counted. To assess gland  
1006 fragments dual positive for TROP2 and KI-67, regions of TROP2+ staining that contained KI-  
1007 67+ nuclei were counted and expressed as a percentage of all TROP2+ glands.

1008

#### 1009 *Type IV Secretion System Activity*

1010

1011 *Hp* strain PMSS1 was recovered from infected mice after euthanasia by serial dilution plating,  
1012 described above, and five or six individual colonies per mouse were expanded and frozen at  $-80^{\circ}\text{C}$ .  
1013 Colonies were then grown and used in co-culture experiments with AGS cells (from a human



1014 gastric adenocarcinoma cell line; ATCC CRL-1739) as previously described <sup>6</sup>. The input strain of  
1015 PMSS1 (freezer stock) served as a positive control and a PMSS1 $\Delta$ *cagE* mutant <sup>6</sup> served as a  
1016 negative control. Infections were performed in triplicate and supernatants were collected after 24  
1017 hours of co-culture. IL-8 was detected using a human IL-8 enzyme-linked immunosorbent assay  
1018 (ELISA) kit from BioLegend.

1019

#### 1020 *Statistical Analyses*

1021

1022 Volcano plots and heat maps were constructed from data generated by nSolver software  
1023 (NanoString). Other statistics were performed in GraphPad Prism v7.01. Comparisons of three or  
1024 more groups were performed with the Kruskal-Wallis test followed by Dunn's multiple test  
1025 correction.  $P < 0.05$  was considered statistically significant. For histopathological evaluation of  
1026 stomach sections and quantitation of staining, experimenters were blinded to the treatment  
1027 groups.

1028

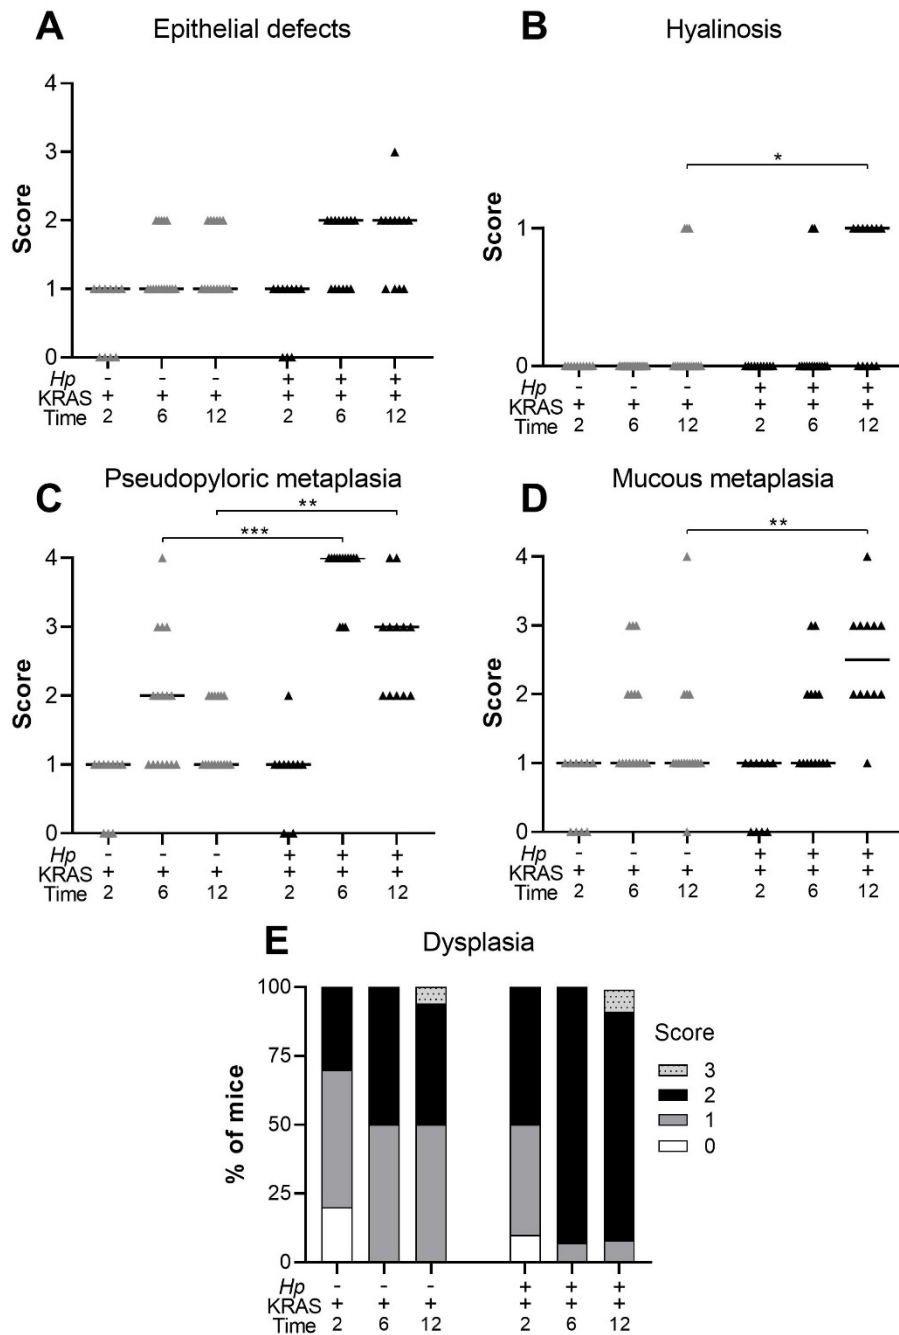

1029  
1030

1031 **Figure S1. Concomitant *Hp* infection and active KRAS expression elicits changes to the**  
 1032 **stomach corpus.** Corpus tissue from n=10-16 mice per group was evaluated for tissue pathology  
 1033 in a blinded fashion according to criteria adapted from Rogers<sup>4,6</sup>. Tissue was assessed for: (A)  
 1034 epithelial defects; (B) hyalinosis (a mouse-specific lesion denoted by the presence of brightly  
 1035 eosinophilic round or crystalline structures in the gastric surface epithelium); (C) pseudopyloric  
 1036 metaplasia (replacement of oxyntic mucosa with glands with a more antral-like phenotype); (D)  
 1037 mucous metaplasia (a mouse-specific lesion denoted by replacement of oxyntic mucosa with  
 1038 glands resembling Brunner's glands of the duodenum); and (E) dysplasia, with gastric

1039 intraepithelial neoplasia given a score of 3. The sum of these subscores and those shown in the  
1040 main text gives the histological activity index. Data are combined from N=2 independent mouse  
1041 experiments per time point. Data points represent actual values for each individual mouse and  
1042 bars indicate median values. Statistically significant comparisons are indicated by: \*  $P < 0.05$ , \*\*  
1043  $P < 0.01$ , \*\*\*  $P < 0.001$ , Kruskal-Wallis test with Dunn's multiple test correction.  
1044

## *Hp*+/*KRAS*-, 12

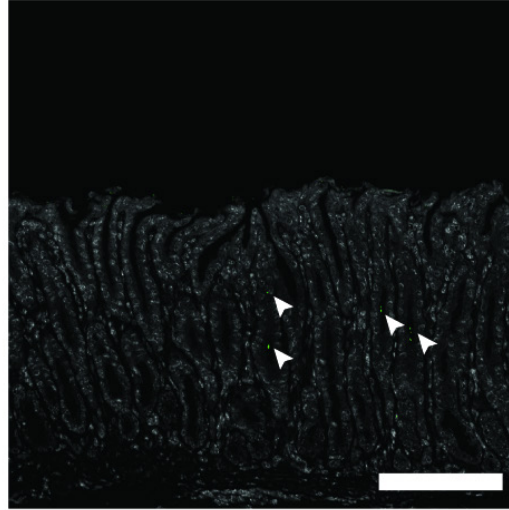

## *Hp*+/*KRAS*+, 12

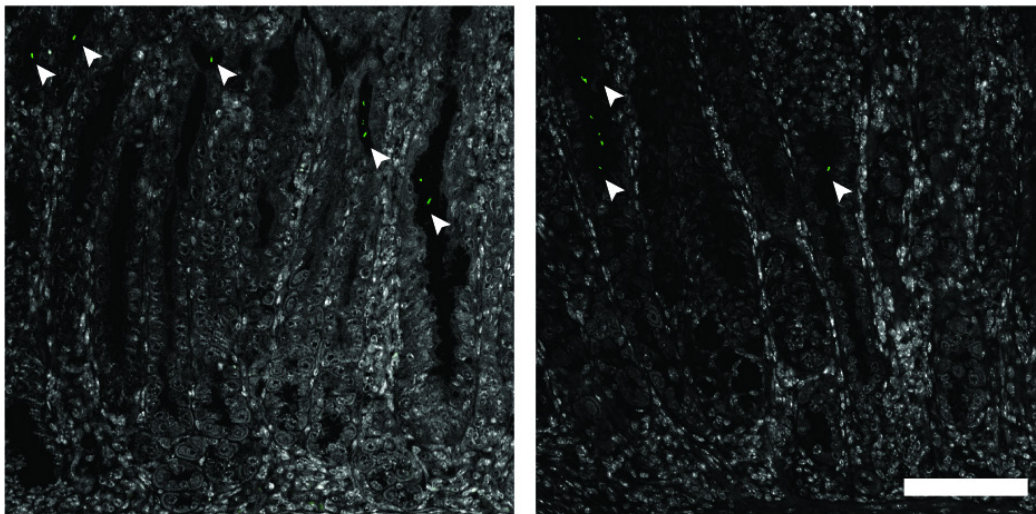

## *Hp* (anti-PMSS1) DAPI

1045  
1046  
1047  
1048  
1049  
1050  
1051

**Figure S2. *Hp* is detected within gastric glands by immunohistochemistry.** Thin stomach sections from *Hp*+/*KRAS*- mice (top) and *Hp*+/*KRAS*+ mice (bottom) obtained at the 12 week time point were stained with an anti-*Hp* strain PMSS1 antibody (green) and DAPI (grey) in N=1 staining experiment with n=4 mice per group. *Hp* (arrowheads) could be detected within the glands. Scale bars, 100  $\mu$ m.

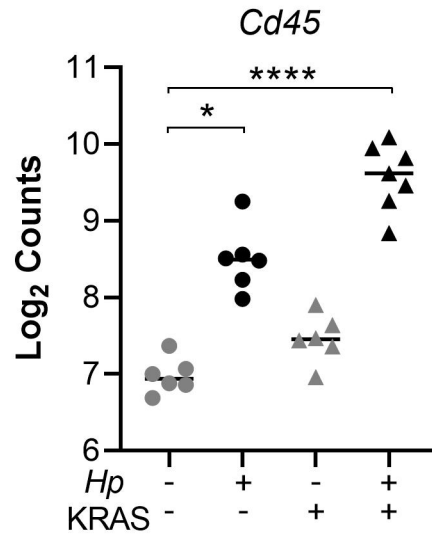

1052

1053 **Figure S3. Infected mice have greater immune cell infiltration than mock-infected mice do**  
1054 **at 12 weeks.** RNA was extracted from stomach sections from *Hp*<sup>+/-</sup>, *KRAS*<sup>+/-</sup> mice at 12 weeks  
1055 and immune-related gene expression was detected with the NanoString nCounter Mouse  
1056 Immunology Panel. Expression of the pan-immune cell marker *Cd45* is shown. Data points  
1057 represent actual values for each individual mouse and bars indicate median values. Statistically  
1058 significant comparisons are indicated by: \*  $P < 0.05$ , \*\*\*\*  $P < 0.0001$ , Kruskal-Wallis test with  
1059 Dunn's multiple test correction. Data comes from N=1 NanoString experiment with n=6-7 mice  
1060 per group from N=2 independent mouse experiments.

1061



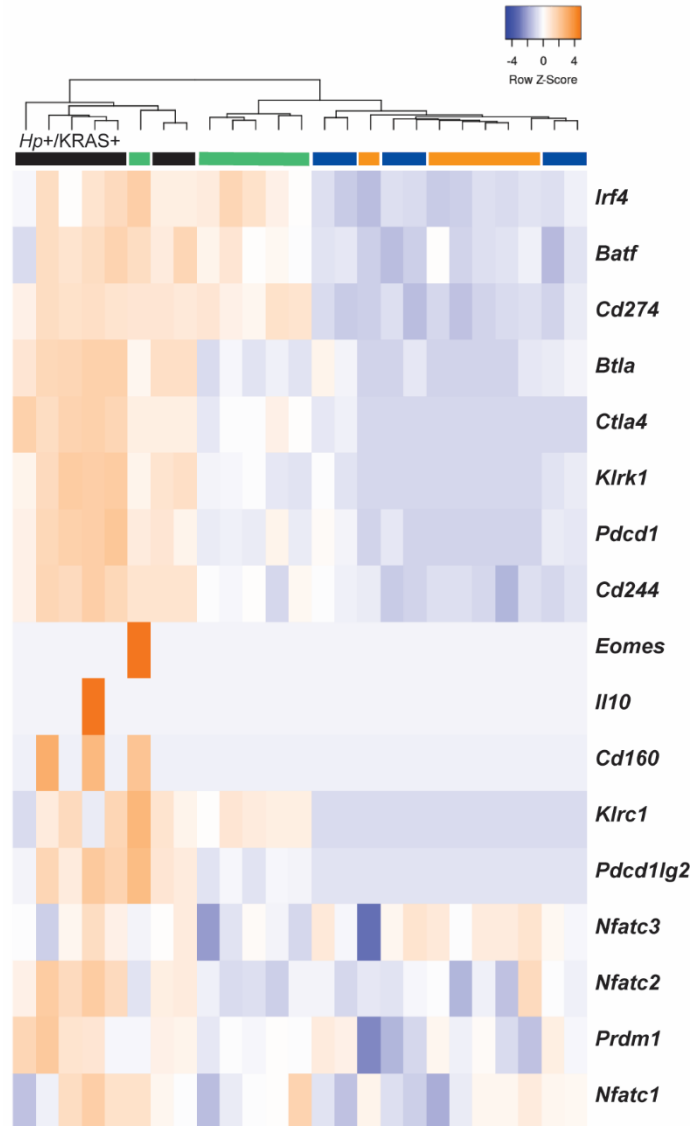

1062

1063 **Figure S4. T cell exhaustion markers are upregulated in *Hp+/KRAS+* mice at 12 weeks.**

1064 RNA was extracted from stomach sections from *Hp+/-*, *KRAS+/-* mice at 12 weeks and immune-

1065 related gene expression was detected with the NanoString nCounter Mouse Immunology Panel.

1066 Expression of T cell exhaustion-related genes is shown. The dendrogram at the top of the heat

1067 map was produced by hierarchical clustering. Colored bars denote different treatment groups:

1068 orange is *Hp-/KRAS-*, green is *Hp+/KRAS-*, blue is *Hp-/KRAS+*, and black is *Hp+/KRAS+*.

1069 Data comes from N=1 NanoString experiment with n=6-7 mice per group from N=2 independent

1070 mouse experiments.

1071

1072

1073

1074

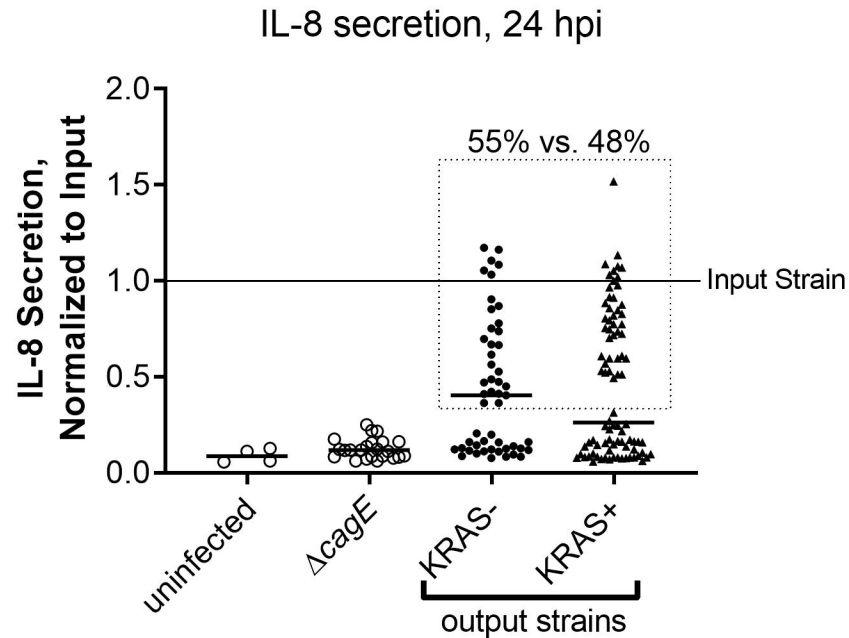

1075  
1076  
1077  
1078  
1079  
1080  
1081  
1082  
1083  
1084  
1085  
1086  
1087  
1088  
1089  
1090  
1091

**Figure S5. *Hp* isolates from  $KRAS^-$  and  $KRAS^+$  mice exhibit similar retention vs. loss of type IV secretion system activity.** The ability of *Hp* to elicit IL-8 secretion during co-culture with AGS gastric adenocarcinoma cells was used as a readout for functional type IV secretion. *Hp* strain PMSS1 was recovered from mice 12 to 15 weeks after active  $KRAS$  induction or sham induction (N=2 independent experiments), and individual colonies (n=5-6 per mouse) were used in triplicate co-culture experiments with AGS cells *in vitro*. At 24 hours post-infection, supernatants were collected and IL-8 was measured by enzyme-linked immunosorbent assay (ELISA). Absorbance values were normalized to the input strain (PMSS1 freezer stock). Shown are the average, normalized IL-8 values of individual *Hp* output isolates from  $KRAS^-$  and  $KRAS^+$  mice. Uninfected AGS cells, and cells infected with PMSS1 $\Delta cagE$ , which cannot assemble the type IV secretion system (T4SS), were included as controls. The difference in IL-8 secretion levels is not statistically significantly different ( $P > 0.05$ , Mann-Whitney U test). The dotted line encloses isolates deemed to have T4SS activity (55% of isolates from  $KRAS^-$  mice and 48% of isolates from  $KRAS^+$  mice,  $P > 0.05$ , Fisher's exact test).

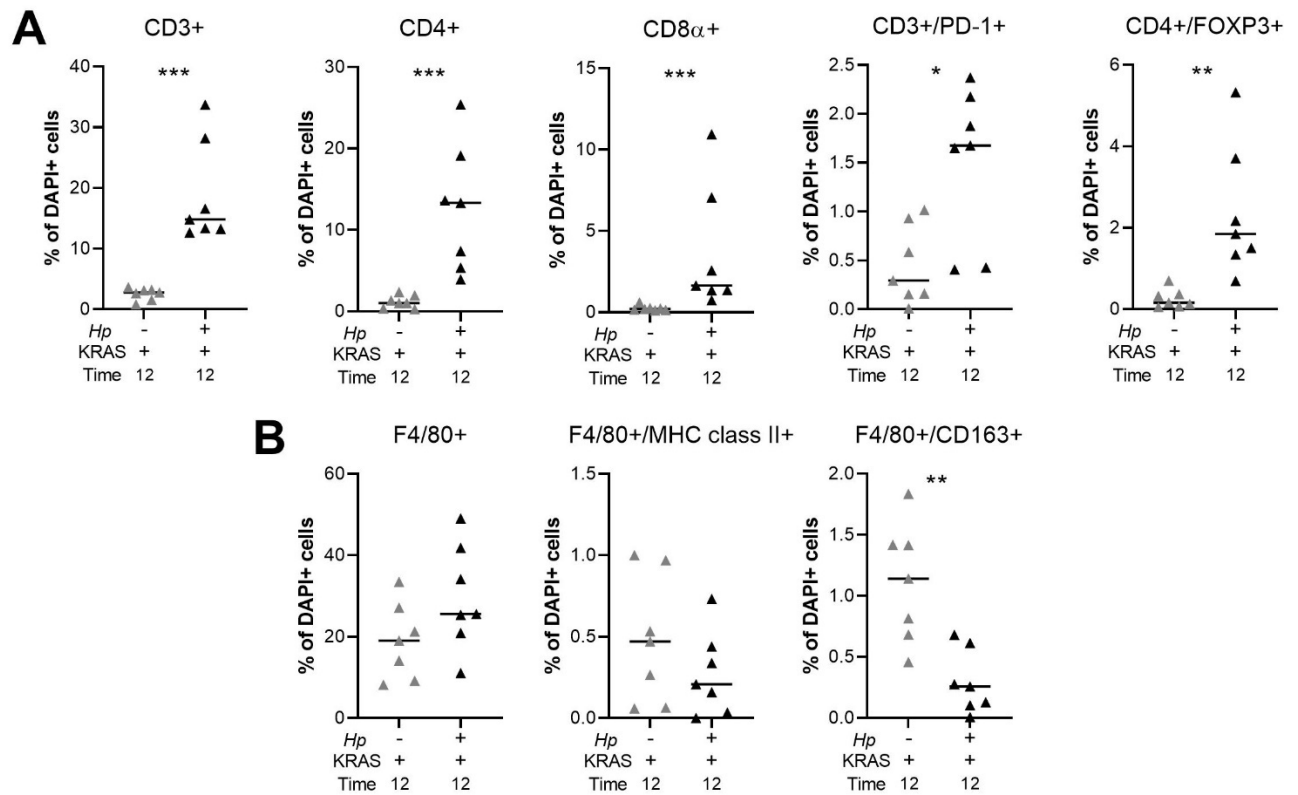

1092

1093

1094 **Figure S6. Quantitation of multiplex IHC confirms robust T cell infiltration and altered**  
1095 **macrophage polarization in *Hp*+/*KRAS*+ mice.** HALO software was used to detect and  
1096 quantify the indicated T cell (A) and F4/80+ (B) subsets. Results are expressed as the percentage  
1097 of all DAPI+ cells within a given image. Two images per mouse were detected and the average  
1098 result for each marker is plotted. Bars indicate median values. Statistically significant  
1099 comparisons are indicated by: \*  $P < 0.05$ , \*\*  $P < 0.01$ , \*\*\*  $P < 0.001$ , Mann-Whitney U test.

1100

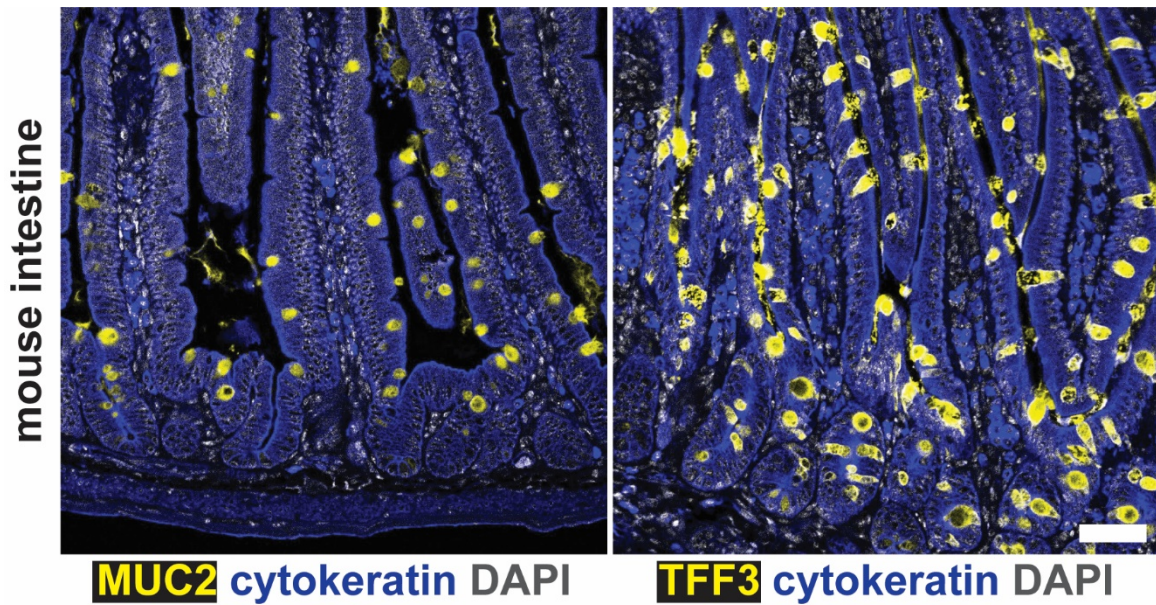

1101

1102

1103

**Figure S7. Goblet cells of mouse intestinal tissue stain positive for MUC2 and TFF3.**

1104

Formalin-fixed, paraffin-embedded intestinal tissue from an untreated C57BL/6 mouse was

1105

deparaffinized and stained with the indicated antibodies in N=1 staining experiment conducted in

1106

parallel with the gastric staining shown in **Figure 6**. Representative images are shown. Scale bar,

1107

50  $\mu$ m.

1108

1109

1110

1111



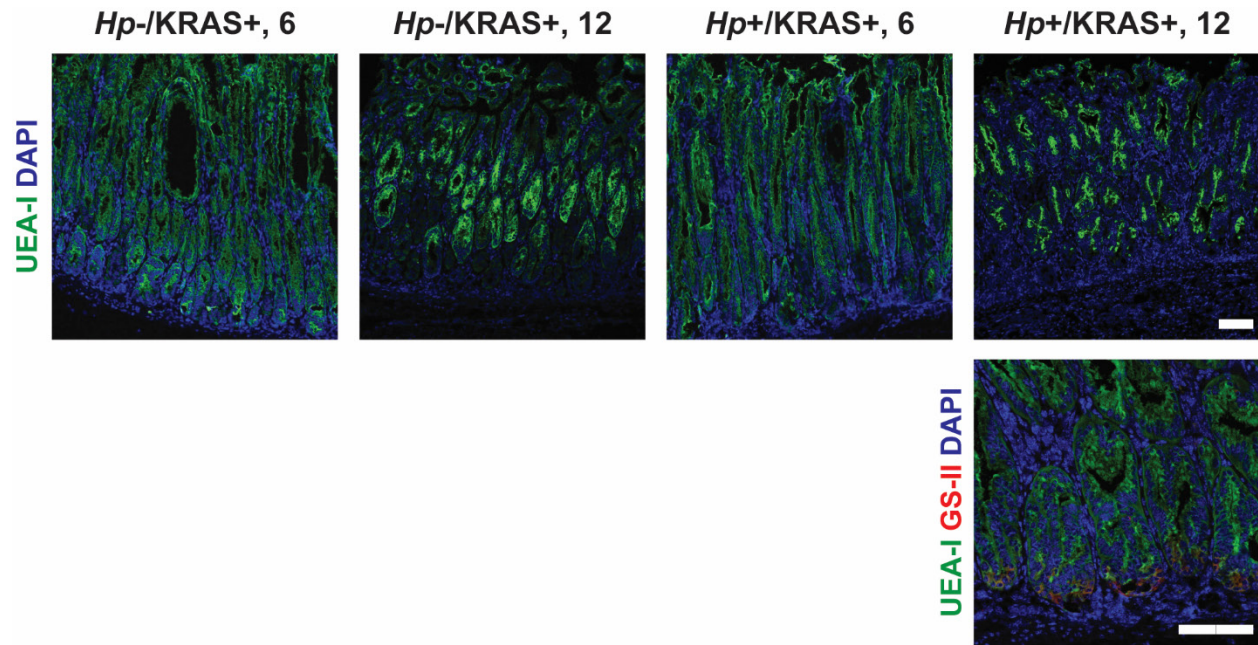

1112

1113 **Figure S8. Foveolar hyperplasia does not differ between *Hp-/KRAS+* and *Hp+/KRAS+***  
1114 **mice.** Corpus tissue from *Hp-/KRAS+* and *Hp+/KRAS+* mice obtained after six or 12 weeks  
1115 (N=2 independent mouse experiments per time point) was assessed for foveolar hyperplasia via  
1116 immunofluorescence microscopy. Stomachs were stained with the lectin UEA-I (green), which  
1117 binds alpha-L-fucose in pit cells, as well as the lectin GS-II (red) and DAPI in N=2 staining  
1118 experiments. Representative images are shown. Scale bars, 100  $\mu$ m.

1119

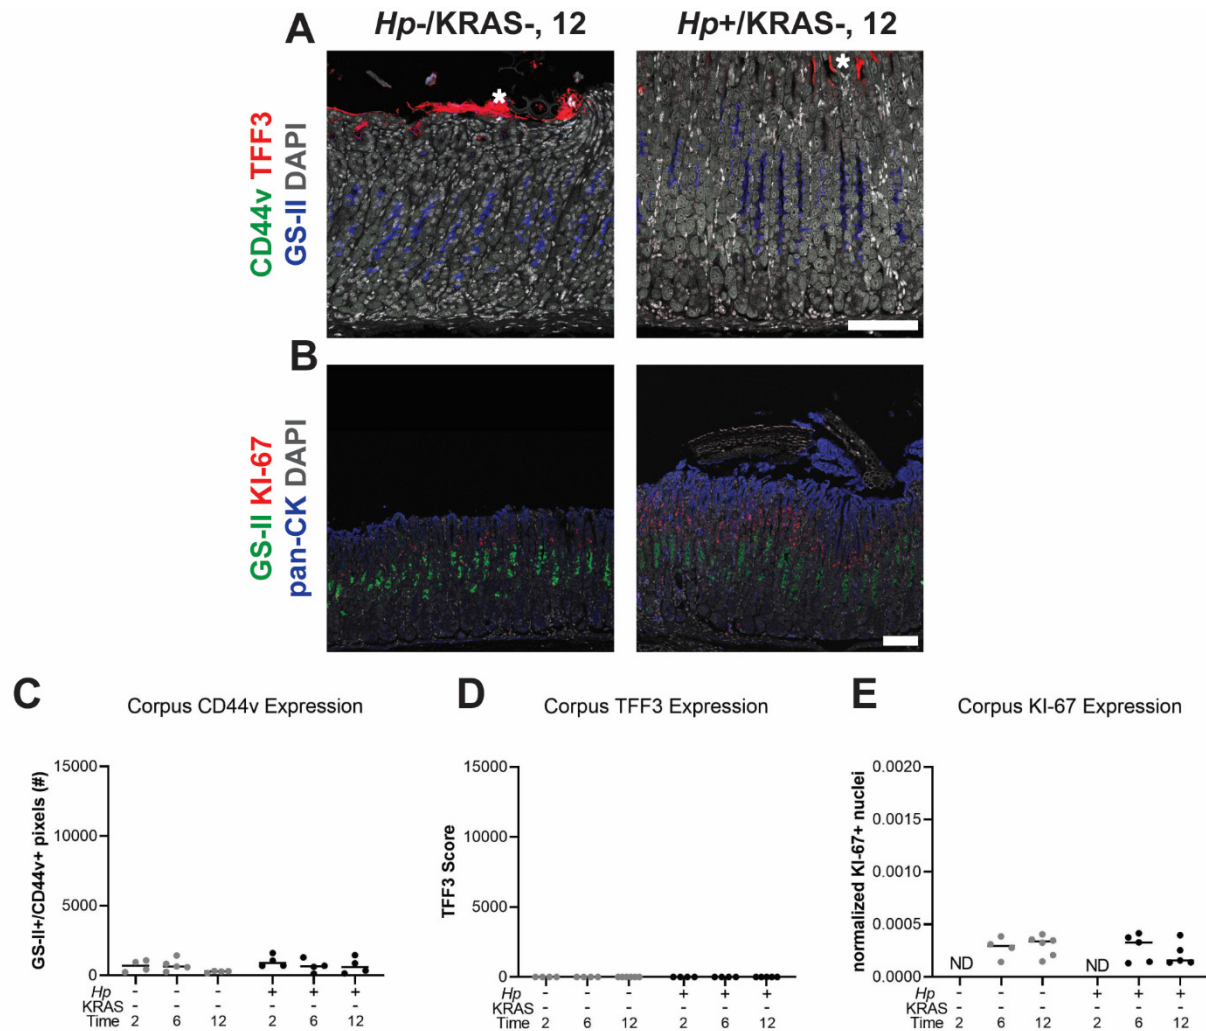

1120

1121 **Figure S9. Metaplasia marker expression is not detected in *KRAS*<sup>-</sup> mice** Corpus tissue from  
 1122 *Hp*-/*KRAS*<sup>-</sup> and *Hp*+/*KRAS*<sup>-</sup> mice obtained after two, six or 12 weeks (N=2 independent mouse  
 1123 experiments per time point) was assessed for metaplasia via immunofluorescence microscopy.  
 1124 **(A and B)** (A) Stomachs were stained with antibodies against CD44v (green, no staining  
 1125 detected) and TFF3 (red), the lectin GS-II (blue) and DAPI (grey) in N=3 staining experiments.  
 1126 Asterisks show examples of non-specific (false-positive) TFF3 staining, which is not cell-  
 1127 associated, whereas specific staining is diffuse throughout the cytoplasm. (B) Stomachs were  
 1128 stained with antibodies against KI-67 (red) and pan-cytokeratin (blue), the lectin GS-II (green)  
 1129 and DAPI (grey) in N=3 staining experiments. Representative images are shown. Scale bars, 100  
 1130  $\mu$ m. (C-E) Three to five representative images per mouse were quantitatively or semi-  
 1131 quantitatively assessed and the median value for each mouse is plotted. Bars on the graphs  
 1132 indicate the median value for each mouse group. (C) The number of GS-II+/CD44v+ pixels per  
 1133 image was quantified. (D) TFF3 staining was semi-quantitatively scored in a blinded fashion.  
 1134 Non-specific staining was not included in the score. (E) KI-67+/DAPI+ nuclei were enumerated  
 1135 and normalized to the DAPI content (total number of DAPI+ pixels) of each image. ND, not  
 1136 determined.

1137

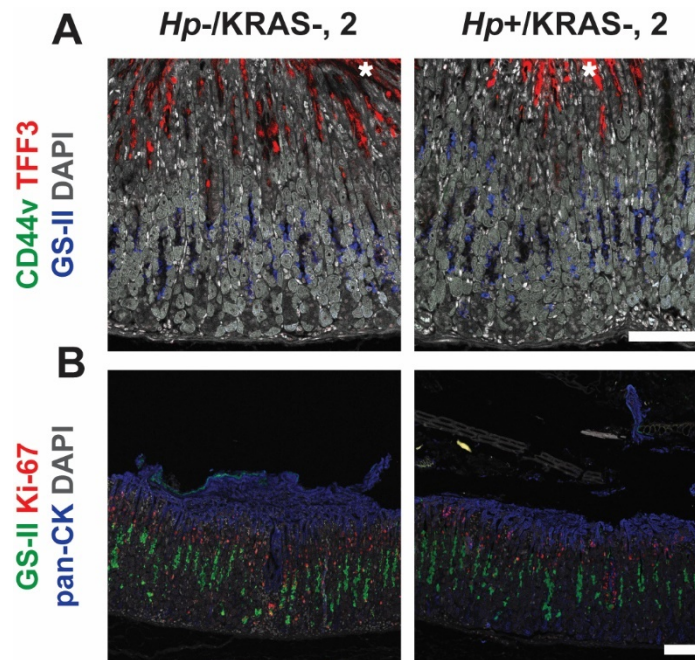

1138

1139 **Figure S10. Metaplasia marker expression is low in *KRAS*<sup>+</sup> mice at the two week time**  
1140 **point.** Corpus tissue from *Hp*-/*KRAS*<sup>+</sup> and *Hp*+/*KRAS*<sup>+</sup> mice obtained after two weeks (N=2  
1141 independent mouse experiments) was assessed for metaplasia via immunofluorescence  
1142 microscopy. Representative images are shown. Scale bars, 100  $\mu$ m. (A) Stomachs were stained  
1143 with antibodies against CD44v (green, no staining detected) and TFF3 (red), the lectin GS-II  
1144 (blue) and DAPI (grey) in N=3 staining experiments. Asterisks show examples of non-specific  
1145 (false-positive) TFF3 staining, which is not cell-associated, whereas specific staining is diffuse  
1146 throughout the cytoplasm. (B) Stomachs were stained with antibodies against KI-67 (red) and  
1147 pan-cytokeratin (blue), the lectin GS-II (green) and DAPI (grey) in N=3 staining experiments.

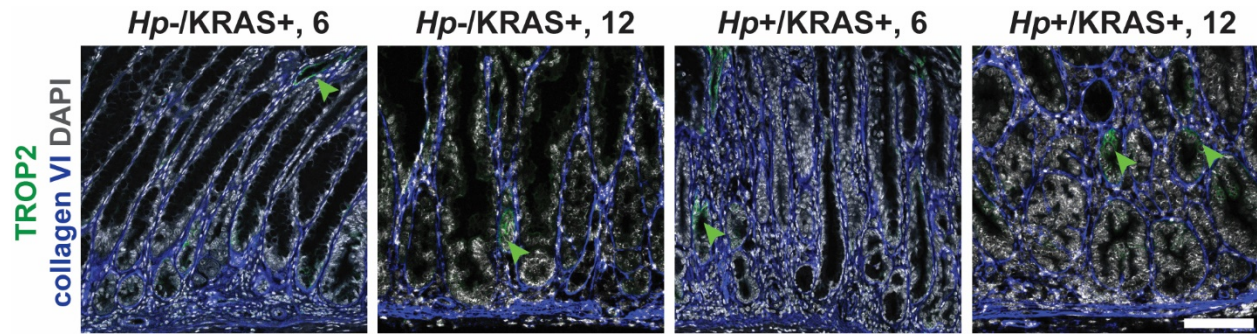

1148

1149 **Figure S11. *Hp* infection increases TROP2 expression in *KRAS*<sup>+</sup> mice.** Stomachs from *Hp*-  
1150 /*KRAS*<sup>+</sup> and *Hp*<sup>+</sup>/*KRAS*<sup>+</sup> mice obtained after six or 12 weeks (N=2 independent mouse  
1151 experiments per time point) were assessed via immunofluorescence microscopy. Stomachs were  
1152 stained with antibodies against TROP2 (green) and collagen VI (blue) and DAPI (grey) in N=3  
1153 experiments. Representative images are shown and arrows show TROP2<sup>+</sup> glands. Scale bar, 100  
1154  $\mu$ m. Collagen VI staining was used to detect individual gland fragments for TROP2  
1155 quantification.

1156

1157



1158

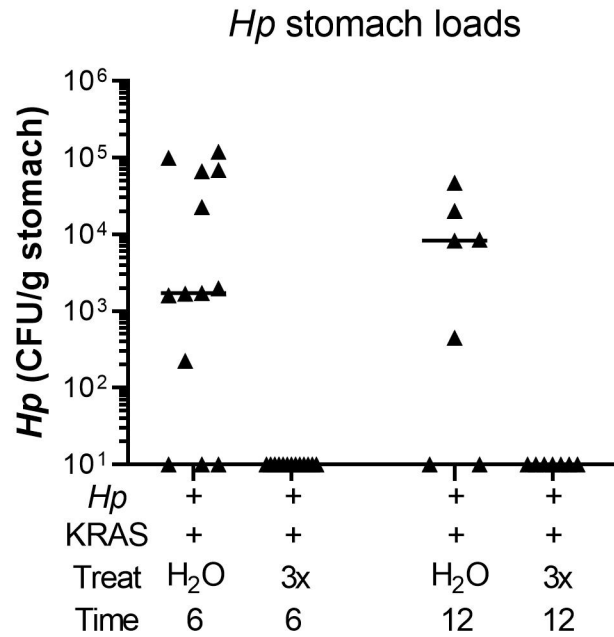

1159

1160 **Figure S12. Antibiotic therapy eliminates *Hp* from the stomach.** *Hp*<sup>+</sup>/*KRAS*<sup>+</sup> mice received  
1161 antibiotics (“3x”) or vehicle (“H<sub>2</sub>O”) after two weeks and were euthanized at six weeks (left), or  
1162 received antibiotics or vehicle after six weeks and were euthanized at 12 weeks. *Hp* loads were  
1163 assessed by quantitative culture; mice with no detectable colonization were plotted at the limit of  
1164 detection.

| Position | Antibody     | Clone & Host           | Manufacturer & Catalog Number | Dilution (Conc.)      | Secondary                 | Opal Dye        |
|----------|--------------|------------------------|-------------------------------|-----------------------|---------------------------|-----------------|
| 1        | MHC class II | M5/114.15<br>.2<br>Rat | eBioscience<br>14-5321-85     | 1:200<br>(2.5 µg/ml)  | ImmPress<br>Rat-HRP       | <b>Opal 480</b> |
| 2        | PD-1         | D7D5W<br>Rabbit        | Cell Signaling<br>#84651      | 1:50<br>(1.9 µg/ml)   | Powervision<br>Rabbit-HRP | <b>Opal 650</b> |
| 3        | CD3          | SP7<br>Rabbit          | Thermo<br>RM-9107-S           | 1:400                 | Powervision<br>Rabbit-HRP | <b>Opal 520</b> |
| 4        | F4/80        | D2S9R<br>Rabbit        | Cell Signaling<br>20076S      | 1:4000<br>(0.1 µg/ml) | Powervision<br>Rabbit-HRP | <b>Opal 540</b> |
| 5        | CD4          | 4SM95<br>Rat           | eBioscience<br>14-9766-32     | 1:250<br>(2 µg/mL)    | ImmPress<br>Rat-HRP       | <b>Opal 570</b> |
| 6        | FoxP3        | FJK-16s<br>Rat         | eBioscience<br>14-5773-82     | 1:200<br>(2.5 µg/ml)  | ImmPress<br>Rat-HRP       | <b>Opal 620</b> |
| 7        | CD163        | EPR19518<br>Rabbit     | Abcam<br>ab182422             | 1:500<br>(1.4 µg/ml)  | Powervision<br>Rabbit-HRP | <b>Opal 690</b> |
| 8        | CD8 $\alpha$ | 4SM15<br>Rat           | eBioscience<br>14-0808-82     | 1:1000<br>(0.5 µg/ml) | ImmPress<br>Rat-HRP       | <b>Opal 780</b> |

1165 **Supplementary Table 1.** Antibodies used to detect immune cell subsets via multiplex  
1166 immunohistochemistry with the Leica BOND RX system.  
1167

1168

| Marker                             | Species                                    | Dilution         | Source                                                            | Purpose                              |
|------------------------------------|--------------------------------------------|------------------|-------------------------------------------------------------------|--------------------------------------|
| <i>Hp</i> strain PMSS1             | Rabbit                                     | 1:1000           | Gift from Manuel Amieva (Stanford University) to N.R.S.           | Detection of <i>Hp</i>               |
| Collagen VI                        | Rabbit                                     | 1:100            | 600-401-108; Rockland (USA)                                       | Identification of individual glands  |
| Pan-cytokeratin                    | Mouse                                      | 1:200 or 1:300   | C1801; Sigma (USA)                                                | Identification of gastric epithelium |
| KI-67                              | Rabbit                                     | 1:300            | 12202; Cell Signaling Technology (USA)                            | Proliferating cell marker            |
| UEA-I                              | Lectin from <i>Ulex europaeus</i>          | 1:2000           | L9006; Sigma (USA)                                                | Foveolar hyperplasia marker          |
| GS-II                              | Lectin from <i>Griffonia simplicifolia</i> | 1:1000 or 1:2000 | L21415, L21416, L32451; Fisher (USA)                              | SPEM and mucous neck cell marker     |
| CD44v10 (ortholog of human CD44v9) | Rat                                        | 1:25,000         | LKGM002; Cosmo Bio (Japan)                                        | SPEM marker                          |
| TFF3                               | Rabbit                                     | 1:1000           | Gift from Daniel K. Podolsky (UT Southwestern) to E.C. and J.R.G. | Intestinal metaplasia marker         |
| MUC2                               | Rabbit                                     | 1:300            | sc-15334; Santa Cruz (USA)                                        | Intestinal metaplasia marker         |
| TROP2                              | Goat                                       | 1:200            | AF1122; Fisher/R&D Systems (USA)                                  | Dysplasia marker                     |

1169 **Supplementary Table 3.** Antibodies and lectins used to assess metaplasia, dysplasia and cell  
 1170 proliferation in this study.

1171

1172 **Supplemental References**

1173

- 1174 1. Arnold IC, Lee JY, Amieva MR, et al. Tolerance rather than immunity protects from  
1175 Helicobacter pylori-induced gastric preneoplasia. *Gastroenterology* 2011;140:199-209.
- 1176 2. Lee A, O'Rourke J, De Ungria MC, et al. A standardized mouse model of Helicobacter  
1177 pylori infection: introducing the Sydney strain. *Gastroenterology* 1997;112:1386-97.
- 1178 3. Choi E, Hendley AM, Bailey JM, et al. Expression of Activated Ras in Gastric Chief  
1179 Cells of Mice Leads to the Full Spectrum of Metaplastic Lineage Transitions.  
1180 *Gastroenterology* 2016;150:918-30 e13.
- 1181 4. Rogers AB. Histologic scoring of gastritis and gastric cancer in mouse models. *Methods*  
1182 *Mol Biol* 2012;921:189-203.
- 1183 5. Babicki S, Arndt D, Marcu A, et al. Heatmapper: web-enabled heat mapping for all.  
1184 *Nucleic Acids Res* 2016;44:W147-53.
- 1185 6. Martinez LE, O'Brien VP, Leverich CK, et al. Nonhelical Helicobacter pylori Mutants  
1186 Show Altered Gland Colonization and Elicit Less Gastric Pathology than Helical Bacteria  
1187 during Chronic Infection. *Infect Immun* 2019;87.
- 1188
